1 Highly-potent, synthetic APOBEC3s restrict HIV-1 through deamination-independent  
2 mechanisms

3

4 Mollie M. McDonnell<sup>1,2,3</sup>, Suzanne C. Karvonen<sup>2,3</sup>, Amit Gaba<sup>4</sup>, Ben Flath<sup>4</sup>, Linda  
5 Chelico<sup>4</sup>, and Michael Emerman<sup>2,3,\*</sup>

6

7 <sup>1</sup>Molecular and Cellular Biology Graduate Program, University of Washington, Seattle,  
8 WA, USA; <sup>2</sup>Division of Human Biology, <sup>3</sup>Division of Basic Sciences, Fred Hutchinson  
9 Cancer Research Center, Seattle, WA; <sup>4</sup>Department of Biochemistry, Microbiology, and  
10 Immunology, University of Saskatchewan, Saskatoon, Saskatchewan, Canada.

11

12 \*Corresponding author.

13 Michael Emerman, 1100 Fairview Avenue N., C2-023, Seattle WA, USA 98109; Tel:  
14 (206) 667-5058; Fax: (206) 667-6523; [memerman@fredhutch.org](mailto:memerman@fredhutch.org)

15 **Abstract**

16           The *APOBEC3* (*A3*) genes encode cytidine deaminase proteins with potent  
17 antiviral and anti-retroelement activity. This locus is characterized by duplication,  
18 recombination, and deletion events that gave rise to the seven *A3*s found in primates.  
19 These include three single deaminase domain *A3*s (*A3A*, *A3C*, and *A3H*) and four  
20 double deaminase domain *A3*s (*A3B*, *A3D*, *A3F*, and *A3G*). The most potent of the *A3*  
21 proteins against HIV-1 is *A3G*. However, it is not clear if double deaminase domain *A3*s  
22 have a generalized functional advantage to restrict HIV-1. In order to test whether  
23 superior restriction factors could be created by genetically linking single *A3* domains into  
24 synthetic double domains, we combined *A3C* and *A3H* single domains in novel  
25 combinations. We found that *A3C/A3H* double domains acquired enhanced antiviral  
26 activity that is at least as potent, if not better than, *A3G*. These synthetic double domain  
27 *A3*s have more efficiency of packaging into budding virions than their respective single  
28 domains, but this does not fully explain their gain of antiviral potency. The antiviral  
29 activity is conferred both by cytidine-deaminase dependent and independent  
30 mechanisms, with the latter correlating to an increase in RNA binding affinity. T cell  
31 lines expressing this *A3C-A3H* super restriction factor are able to control replicating  
32 HIV-1 $\Delta$ Vif infection to similar levels as *A3G*. Together, these data show that novel  
33 combinations of *A3* domains are capable of gaining potent antiviral activity to levels  
34 similar to the most potent genome-encoded *A3*s, via a primarily non-catalytic  
35 mechanism.

36

37 **Author Summary**

38       Antiviral genes are encoded by all organisms to help protect them from viral  
39 infections, including proteins encoded by primates to protect them from viruses similar  
40 to HIV-1. These antiviral proteins are also called “restriction factors”. Some restriction  
41 factors are broadly acting, while others are very specific. During the course of evolution,  
42 some of these genes have expanded into multiple copies and rearranged in different  
43 versions to give them new activities. However, not all versions of these genes have  
44 been sampled in nature. In this paper, we validated the hypothesis that one particular  
45 antiviral gene family, called the *APOBEC3* family, has the capability of making novel  
46 combinations of antiviral genes with as great, or greater, potency against HIV-1 as the  
47 most potent natural member of this family. By combining parts of the APOBEC3  
48 proteins into novel combinations, we created potent antiviral versions that act through a  
49 mechanism distinct from existing APOBEC3 proteins.

50

## 51 **Introduction**

52       Positive selection in host antiviral genes is a result of the host-virus “arms-race”  
53 due to repeated cycles of host resistance and virus adaptation [1]. These cycles of  
54 mutation-selection that increase the evolutionary rate of single amino acid substitutions  
55 are characteristic of many host genes that counteract HIV and related lentiviruses [1,2].  
56 Additional innovation in host antiviral genes also occurs through gene duplication and  
57 recombination creating antiviral gene families that, through neo- or sub-functionalization  
58 is an attractive evolutionary strategy to expand host anti-pathogen response. For  
59 example, most mammals, including humans, encode two paralogs of Mx proteins, MxA  
60 and MxB. Human MxA has broad and potent activity against a diverse range of RNA

61 and DNA viruses, while the antiviral scope of human MxB is more limited to lentiviruses  
62 and herpesviruses [3–6]. Additionally, *TRIM5*, a potent restriction factor against  
63 lentiviruses, is present in only a single copy in most primates, whereas rodents have up  
64 to six [7]

65 Antiviral gene family expansion is also seen within the *apolipoprotein B mRNA*  
66 *editing enzyme catalytic-polypeptide like 3*, *APOBEC3* (shortened to *A3* here) locus.  
67 *A3s* are a family of cytidine deaminases that hypermutate retroviruses such as HIV-1 as  
68 well as endogenous retroelements. The *APOBEC3* (*A3*) locus, which is unique to  
69 placental mammals, has undergone dramatic expansion in many mammalian lineages,  
70 including primates. For example, the human genome encodes seven *A3* paralogs  
71 (named *A3A*, *A3B*, *A3C*, *A3D*, *A3F*, *A3G*, and *A3H*). In the majority of placental  
72 mammals, the *A3* loci is flanked by *CBX6* and *CBX7* genes, suggesting that the  
73 amplification of *A3* genes has mainly occurred via tandem gene duplication within the  
74 locus [8–11]. In addition to this gene duplication, most of the *A3* proteins are rapidly  
75 evolving in primates, suggesting that each has evolved to counteract pathogens [9,12].

76 The *A3* gene family encodes a characteristic zinc-coordinating catalytic motif  
77 (His-X-Glu-X<sub>23-28</sub>-Pro-Cys-X<sub>2-4</sub>-Cys) which can be grouped into 3 classes (*A3Z1*, *A3Z2*,  
78 and *A3Z3*) on the basis of their conserved Z domain sequences. Of the seven *A3*  
79 paralogs in humans, *A3A*, *A3C*, and *A3H* encode single domain proteins (*A3Z1*, *A3Z2*,  
80 and *A3Z3*, respectively), whereas the four remaining *A3s* are double Z domains. *A3B*  
81 and *A3G* are categorized as *A3Z2-A3Z1*, while *A3D* and *A3F* are *A3Z2-A3Z2*. The  
82 human *A3* proteins also vary in their ability to restrict HIV-1. *A3A* and *A3B* do not have  
83 antiviral activity against HIV-1, while *A3G* is the most potent naturally found *A3*.

84           The human *A3* locus has also diversified through polymorphisms that encode  
85 proteins with different antiviral activities. For example, the common form of *A3C*  
86 encodes a serine at position 188 and weakly inhibits HIV-1, but a natural variant that  
87 encodes for an isoleucine at position 188 has greater antiviral activity [13]. Additionally,  
88 *A3H* has over four major haplotypes circulating in the human population with varying  
89 ability to restrict HIV-1 [14–16]. Because of the potent antiviral restriction these *A3s*  
90 pose, lentiviruses, including HIV-1, have evolved to encode an antagonist, *Vif*, that  
91 abrogates restriction by inducing *A3* degradation. Strain-dependent mutations in *Vif*  
92 affect its ability to degrade different *A3H* variants, indicating that viral polymorphisms  
93 also affect *A3* activity [17,18].

94           Despite the *A3* gene variation in their potency, domain composition, and  
95 susceptibility to antagonism by *Vif*, there are combinations of human *A3* proteins that  
96 remain unsampled. For example, not all of the double *Z* domain combinations have  
97 been sampled by nature, and many combinations of *A3* double domains with  
98 polymorphisms are unsampled. We predicted that novel double domain combinations  
99 may prove to be more effective inhibitors of HIV-1 and we refer to these kinds of  
100 evolutionary-based variants of natural antiviral proteins with improved potency and/or  
101 escape from antagonism as “super restriction factors” [19–21]. Our previous study  
102 showed that duplicating the single *A3Z2* domain protein *A3C* created an *A3C-A3C*  
103 tandem domain protein with increased antiviral activity relative to its single domain  
104 counterpart that was also largely resistant to degradation by HIV-1 *Vif* [20].  
105 Nonetheless, the gain of antiviral potency of *A3C-A3C* is relatively modest and not as  
106 potent as *A3G*, which is the most potent *A3* protein so far described against HIV-1.

107           In this study, we created novel A3 proteins by combining the single domain A3C  
108 with the single domain A3H in different orientations and with different natural  
109 polymorphisms and show that these A3C/A3H double domains are at least as potent  
110 inhibitors of HIV-1 as A3G. A3C/A3H double domains are packaged into virions more  
111 efficiently than their single domain counterparts, but do not have an increase in  
112 hypermutation activity relative to their single domain counterparts. Rather, they have  
113 gained potent antiviral activities independent of cytidine deamination and have gained  
114 stronger affinity for binding RNA. Creation of T cell lines that stably express an  
115 A3C/A3H double domain show that it restricts spreading infection of HIV-1 $\Delta$ Vif as well  
116 as A3G, albeit again, by a different antiviral mechanism. These studies show that by  
117 exploring evolutionary space not sampled by nature, novel combinations of poorly  
118 antiviral A3 proteins can be created that are as potent as the most active A3 proteins.

119

## 120 **Results**

### 121 **A3C/A3H chimeras are at least as potent as A3G**

122           Each of the human A3s is comprised of either one or two of these conserved  
123 zinc-coordinating domains: A3Z1, A3Z2, or A3Z3 (Figure 1A). A3H is unique because it  
124 is the only A3 with a Z3 domain. Furthermore, this Z3 domain has never been  
125 duplicated and recombined to make a Z3-containing double domain A3 in any  
126 mammalian genome [8,9,22]. Therefore, in order to explore the evolutionary potential of  
127 novel A3 combinations, we created synthetic tandem domain proteins consisting of one  
128 Z2 and one Z3 domain together in a single protein. These synthetic Z2-Z3 and Z3-Z2  
129 proteins consist of A3H and the common variant of A3C<sub>S188</sub> domains (Figure 1A). We

130 also used two variants of A3H: haplotype I (hap I), the less stable and less antiviral A3H  
131 protein, and haplotype II (hap II), the more stable and more antiviral A3H protein [15,16]  
132 (Figure 1A). We modeled these synthetic tandem domains after naturally found double  
133 A3Z2 domains: A3D and A3F. We designed Z2/Z3 and Z3/Z2 double domains based on  
134 alignments to A3D and A3F, incorporating the short linker sequence between both  
135 domains (Arg-Asn-Pro) found in A3D and A3F [20]. These designed Z2/Z3 and Z3/Z2  
136 double domain A3s are analogous to natural Z2-Z1 and Z2-Z2 combinations but have  
137 not yet been sampled in primate lineages.

138 In order to test the antiviral activity of these proteins, we performed a single-cycle  
139 infectivity assay by transfecting 293T cells with an expression vector encoding these  
140 synthetic genes along with an HIV-1 provirus lacking the A3 antagonist Vif. A3G was  
141 used as a positive control, as it is the most potent A3. A3G can restrict HIV-1 $\Delta$ Env $\Delta$ Vif  
142 infection by over two orders of magnitude (Figure 1B top). As previously described  
143 [15,16], A3H<sub>hap I</sub> weakly inhibits HIV-1 $\Delta$ Env $\Delta$ Vif, and A3H<sub>hap II</sub> more potently inhibits HIV-  
144 1 $\Delta$ Env $\Delta$ Vif, though not as strongly as A3G despite similar expression levels (Figure 1B).  
145 A3C also weakly inhibits HIV-1 $\Delta$ Env $\Delta$ Vif, but as we previously reported, the antiviral  
146 activity of A3C can be increased several fold by creating a synthetic tandem domain,  
147 A3C-A3C [20]. Nonetheless, A3C-A3C is still less antiviral than A3G at similar  
148 expression levels. In contrast, we found that A3C-A3H<sub>hap I</sub> and A3H<sub>hap I</sub>-A3C synthetic  
149 tandem domain proteins were as potent A3G (Figure 1B top). Thus, remarkably, two A3  
150 single domain proteins that on their own have little antiviral activity, can produce a  
151 synthetic double domain protein with the ability to restrict HIV-1 $\Delta$ Env $\Delta$ Vif by two orders  
152 of magnitude.

153           Moreover, when combining A3C with the more active A3H haplotype, A3H<sub>hap II</sub>, to  
154   create A3C-A3H<sub>hap II</sub> and A3H<sub>hap II</sub>-A3C, we could make antiviral proteins that are 9-fold  
155   and 11-fold, respectively, more active against HIV-1 $\Delta$ Env $\Delta$ Vif than A3G (Figure 1B top).  
156   This increase in antiviral activity could not be explained by increased expression levels  
157   since A3C and A3H<sub>hap II</sub> single domain proteins are expressed to similar levels as A3C-  
158   A3H<sub>hap II</sub> and A3H<sub>hap II</sub>-A3C (Figure 1B bottom). Additionally, A3C-A3H<sub>hap II</sub> and A3H<sub>hap II</sub>-  
159   A3C are expressed to the same level as A3G (Figure 1B bottom).

160           To more thoroughly examine whether activity is correlated with expression level,  
161   we transfected different amounts of plasmids encoding these synthetic tandem domain  
162   proteins along with A3G. A3G could restrict HIV-1 $\Delta$ Env $\Delta$ Vif approximately 3-fold even at  
163   the lowest level of DNA transfected (10ng). However, both A3C-A3H<sub>hap II</sub> and A3H<sub>hap II</sub>-  
164   A3C were able to restrict HIV-1 $\Delta$ Env $\Delta$ Vif more potently than A3G at every dose tested  
165   (Figure 1C). Even at the lowest dose of 10ng with low protein level expression, both  
166   A3C-A3H<sub>hap II</sub> and A3H<sub>hap II</sub>-A3C were able to inhibit HIV-1 $\Delta$ Env $\Delta$ Vif approximately 30-  
167   and 70- fold, respectively. In summary, by creating novel double domains from poorly-  
168   restrictive single domain A3s, we can create a super restriction factor that is at least as  
169   potent than A3G even at the lowest end of protein expression.

170

### 171   **A3C/A3H chimeras are packaged better than their single domain counterparts**

172           Previous studies have found a direct correlation of increase in packaging to  
173   potency of A3s [23,24]. Therefore, we evaluated the packaging of A3C/A3H<sub>hap II</sub> double  
174   domains to get packaged into virions. We focused the experiments on A3C/A3H<sub>hap II</sub> and  
175   A3H<sub>hap II</sub>/A3C (hereafter referred to as A3C/A3H and A3H/A3C) double domains as they



176 were the most potent combination in our assays (Figure 1). The intracellular expression  
177 levels of the naturally found A3s, A3G, A3H<sub>hap II</sub>, and A3C, are all similar to A3C-A3H  
178 and A3H-A3C (Figure 2 top). Both A3C and A3H<sub>hap II</sub> single domain proteins are poorly  
179 incorporated into virions (Figure 2 bottom). As we previously reported [20], the double  
180 domain A3C-A3C is packaged 4.9-fold more than A3C and at similar levels to A3G  
181 (Figure 2 bottom). Here, we found that A3C/A3H double domains also have an increase  
182 in packaging relative to their single domain counterparts; A3C-A3H is packaged 6.0-fold  
183 more than A3C and A3H-A3C is packaged 7.6-fold more than A3C (Figure 2 bottom).  
184 However, the increase in packaging of A3C/A3H alone is unlikely to explain all of the  
185 650-fold increase in antiviral activity between A3C and A3C/A3H double domains since  
186 A3C-A3C is also packaged at similar levels but is not nearly as potent an antiviral  
187 protein.

188

189 **A3C/A3H chimeras have gained a deaminase-independent mechanism to inhibit**  
190 **HIV that correlates with inhibition of reverse transcription (RT) products and**  
191 **increased affinity for RNA**

192 Naturally found A3 proteins primarily use deaminase-dependent mechanisms to  
193 inhibit HIV-1 by converting cytidines to uracils on ssDNA in the minus strand 1 during  
194 reverse transcription, leading to G-to-A mutations in the dsDNA [25]. A3G, the most  
195 potent A3G, has been documented to induce hypermutation of up to 10% of guanosine  
196 residues in the HIV-1 genome [26]. Mutating the active sites in A3G mostly, but not  
197 completely, abrogates the antiviral activity, demonstrating the primary uses of  
198 deaminase-dependent methods of hypermutation to inhibit HIV-1 replication [27,28].

199 Previously, we found that A3C-A3C double domain proteins did not increase the amount  
200 of G-to-A mutations in HIV-1 in a single-cycle infectivity assay, but rather increased their  
201 antiviral activity through inhibition of reverse transcription [20].

202 To test whether or not the large increase in antiviral activity of A3C/A3H double  
203 domains can be explained by an increase in hypermutation, we analyzed HIV-1  
204 hypermutation induced by each A3C/A3H double domain using a previously developed  
205 method to deep sequence all G-to-A mutations induced by a given A3 over a region of  
206 HIV-1 *pol* [20]. A “plasmid control” was used to identify PCR- and Illumina-induced  
207 errors while the “No A3” condition controlled for mutations that arise during reverse  
208 transcription (Figure 3A). Consistent with previous results [20], we found that A3G  
209 induces more than 1 mutation in over 96% of the reads and more than 10 mutations in  
210 over 43% of the reads. In contrast, A3C induced far fewer reads with G-to-A mutations,  
211 with only 12% of the reads having 2 or more mutations. As previously reported [20],  
212 A3C-A3C induces similar frequencies of G-to-A mutations as A3C. A3H<sub>hap II</sub> induced at  
213 least one G-to-A mutation in more than half of all reads and 10 or more mutations in  
214 approximately 10% of the reads, demonstrating significant hypermutation, but less than  
215 A3G. In contrast, despite the 500-fold increase in antiviral activity of A3C-A3H and A3H-  
216 A3C compared to A3H<sub>hap II</sub>, we found no increase in hypermutation of A3C-A3H and  
217 A3H-A3C relative to A3H<sub>hap II</sub> (Figure 3A compare distribution of mutations in right box  
218 on the top row with the distribution of mutations in the last right most boxes on the  
219 bottom row). A3H-A3C induces at least one mutation in approximately 30% of reads,  
220 similar to A3C-A3C or A3C alone. A3C-A3H induces at least one G-to-A mutation in  
221 55% of the reads and 2 or more mutations in 38% of all reads, similar to the level of

222 A3H<sub>hapII</sub>-mediated hypermutation. The low levels of hypermutation for these potent  
223 antiviral double domain proteins suggests a hypermutation-independent mechanism for  
224 super restriction.

225 In order to complement the A3-mediated hypermutation analysis, we also made  
226 catalytically inactive A3C/A3H proteins by mutating the glutamic acid essential for the  
227 deamination reaction in both domains of the double domain proteins. We found that  
228 restriction by the catalytically inactive version of A3C-A3H, A3C-A3H E60A E240A,  
229 called A3C-A3H cat KO, was indistinguishable from the unmutated A3C-A3H (0.12%  
230 infectivity versus 0.08% infectivity (Figure 3B). This suggests that A3C-A3H primarily  
231 uses cytidine deaminase-independent mechanism of restriction, supporting the  
232 conclusions from the hypermutation data. Interestingly, in A3H-A3C when both active  
233 sites have been mutated to an alanine, A3H-A3C E57A E247A (here called A3H-A3C  
234 cat KO), can only inhibit HIV-1 $\Delta$ Env $\Delta$ Vif to 0.39% (compared to 0.15% infectivity with  
235 wild-type A3H-A3C), suggesting that A3H-A3C also uses both a deaminase-dependent  
236 and a deaminase-independent mechanism to restrict HIV-1 (Figure 3B). Thus, these  
237 data support a model that novel combinations of A3 domains have created super  
238 restriction factors that potently inhibit HIV-1 $\Delta$ Env $\Delta$ Vif predominantly through a  
239 deaminase-independent mechanism.

240 We also quantified the amount of late RT products in the presence of synthetic  
241 A3s. Unintegrated DNA was harvested 18 hours after infection and quantified by qPCR,  
242 normalized to the amount of virus used for each infection. As previously reported [28–  
243 30], virus produced in the presence of A3G showed a significant decrease in relative  
244 late RT products compared to the no A3 control (Figure 3C). On the other hand, virus

245 produced in the presence of A3H<sub>hap II</sub> or A3C had similar levels of late RT products as  
246 the no A3 control. Strikingly, virus made in the presence of A3C-A3H or A3H-A3C  
247 accumulated even fewer late RT products than in the presence of A3G (Figure 3C),  
248 mirroring the difference in antiviral activity (Figure 1B). These results suggest that  
249 inhibition of the formation of reverse transcriptase products is likely the major  
250 mechanism by which the A3C/A3H double domain proteins act and accounts for their  
251 greater antiviral activity relative to A3G. These findings support the hypothesis that  
252 A3C/A3H super restriction factors function in a novel deaminase-independent  
253 mechanism compared to their single domain counterparts.

254 One possible mechanism for inhibition of reverse transcriptase by steric  
255 hinderance or other mechanisms is increased binding to RNA, which would result in  
256 competition between the A3 and reverse transcriptase for the template RNA. This is an  
257 attractive possibility as A3H has previously been shown to bind RNA [31–34]. To  
258 determine the ability of the different A3s to interact with HIV-1 RNA, we conducted  
259 steady-state rotational anisotropy with fluorescein labeled HIV 5'UTR RNA and  
260 increasing amount of A3. The anisotropy can rise or decrease upon interaction of the  
261 binding partners, with a rise indicating a simple interaction and a decrease indicating an  
262 interaction and structural change of the 5'UTR [35,36]. The resulting saturation curves  
263 were analyzed to determine the dissociation constant ( $K_d$ ), where a lower  $K_d$  value  
264 indicates less dissociation and tighter binding. We found that all the A3s examined  
265 decreased the anisotropy of the 5'UTR, suggesting that they were able to change the  
266 RNA structure (Figure 4). A3C-A3H bound RNA with a  $K_d$  of 0.03nM, 17-fold stronger  
267 than A3H<sub>hap II</sub> ( $K_d = 0.52$  nM), consistent with its increase ability to inhibit RT products

268 (Figure 4). A3G exhibited a much lower affinity for the 5'UTR, with a  $K_d$  of 6.36 nM. This  
269 is consistent with A3G inhibiting RT at least in part by binding to reverse transcriptase  
270 directly [28]. These data support the model that increased affinity for RNA is responsible  
271 for increase inhibition of RT by A3C-A3H.

272

273 **Stable expression of A3C-A3H in T cells inhibits HIV-1 replication in a Vif-**  
274 **dependent manner**

275 All the previous experiments were done as single-cycle infectivity assays after  
276 co-transfection of A3 proteins with a provirus to determine antiviral activity. To more  
277 closely mimic natural infection, we next tested whether these super restriction factors  
278 could also inhibit spreading infections of HIV when stably expressed in a T cell line. We  
279 integrated the *A3C-A3H* gene into Jurkat T cells using the Sleeping Beauty transposon,  
280 which should integrate a single copy of *A3C-A3H* into the T cell genome [37]. As  
281 controls, we also created similar cell lines that express A3G or an empty vector. A3G  
282 and A3C-A3H were expressed at similar levels in these lines, as assessed by western  
283 blot (Figure 5A).

284 Jurkat cells expressing empty vector (no A3), A3G, or A3C-A3H were then  
285 infected in triplicate at low MOI (at MOI = 0.01 and 0.05) with a replication-competent  
286 HIV-1 with a deletion that spans the Vif open reading frame (HIV-1 $\Delta$ Vif). Virus  
287 production was monitored over time by collecting supernatant and measuring RT  
288 activity using the SG-PERT assay to measure RT in virions in the supernatants (Figure  
289 5B for MOI= 0.01 and Supplemental Figure 1 for MOI = 0.05) [38]. In Jurkat cells  
290 expressing the empty vector, HIV-1 $\Delta$ Vif grew exponentially until peaking at day 10 at

291 both MOIs of infection (Figure 5B and Supplemental Figure 1A, “No A3”, gray line).  
292 There was no initial restriction of HIV-1 $\Delta$ Vif in A3G-expressing cells, as expected given  
293 the requirement of packaging before HIV-1 restriction. However, at later time points,  
294 HIV-1 $\Delta$ Vif growth was inhibited by the A3G expressing cells, as the RT levels did not  
295 further increase and remained at levels much lower than in Jurkat cells without A3  
296 proteins. Remarkably similar to cells expressing A3G, the cells expressing A3C-A3H  
297 also efficiently controlled infection of HIV-1 $\Delta$ Vif after day 5 of infection.

298 We used the area under the curve (AUC) as a metric to statistically compare  
299 virus spreading between cell lines (Figure 5B). We determined the AUC for each of the  
300 three biological replicate infections and report the mean and standard error (Figure 5B).  
301 We found that the AUC for A3G and A3C-A3H infections were approximately 3-4-fold  
302 less than the no A3 Jurkat cells, indicating significant HIV-1 restriction ( $p = 0.031$  and  
303  $0.046$ , respectively, one-way ANOVA and the post hoc Tukey’s multiple comparisons  
304 test). In contrast, there was no statistical difference between the AUC of the A3G and  
305 A3C-A3H expressing cells. Thus, these results show that A3C-A3H stably expressed in  
306 T cells is as effective as A3G in controlling HIV-1 infection in the absence of Vif.

307 To determine whether the HIV-1 $\Delta$ Vif inhibition in T cells was due to  
308 hypermutation or an alternative mechanism, as determined in the single-cycle infectivity  
309 assays (Figure 3), we harvested genomic DNA from infected cells at day 14 (Figure 5B)  
310 and deep sequenced a region of *pol* to evaluate if integrated proviruses had signatures  
311 of A3 mediated hypermutation (Figure 5C). As in Figure 3, we used a plasmid control to  
312 determine background mutations from PCR and Illumina sequencing errors (Figure 5C).  
313 In the no A3 genomic DNA samples, there are some G-to-A mutations, likely due to

314 reverse transcription errors as well as basal levels of A3 in Jurkat cell lines. In the  
315 genomic DNA of the cells expressing A3G, we find that there is an increase in the  
316 frequency of G-to-A mutations, with approximately 20% of the reads having 10 or more  
317 G-to-A mutations. Consistent with our single-cycle infection data, in the genomic DNA of  
318 cells expressing A3C-A3H, we found that there were very few additional G-to-A  
319 mutations when compared to the no A3 cells. In fact, the no A3 and A3C-A3H frequency  
320 graphs look nearly identical. These data show that A3C-A3H stably expressed in T cells  
321 can inhibit a Vif-deficient HIV-1 as well as A3G, but that the mechanisms of increased  
322 inhibition are largely independent of hypermutation.

323         We also tested if Vif could overcome the antiviral activity A3C-A3H in this system  
324 by infecting each of the three cells lines with wtHIV-1 infection (i.e. HIV-1 that encodes  
325 the Vif protein). We found the wtHIV grew to approximately similar levels regardless of  
326 whether or not any A3 was expressed in these cells (Figure 5D and Supplemental  
327 Figure 1B). We also collected cell lysates from day 14 in the HIV-1 $\Delta$ Vif and wtHIV-1  
328 infection and performed a western blot to examine the intracellular expression levels of  
329 A3G and A3C-A3H. We found that when we compared the intracellular expression in  
330 each of 3 biological replicates of the cell lines that were infected with wtHIV-1 to HIV-  
331 1 $\Delta$ Vif, the A3 expression was lower in the presence of HIV-1 Vif, consistent with the Vif-  
332 mediated degradation of A3 (Figure 5E). Together, these data show that A3C-A3H is  
333 just as potent of a restriction factor as A3G in the absence of HIV-1 Vif; however, it is  
334 nonetheless antagonized by Vif and targeted for degradation.

335

## 336 **Discussion**

337           Here we combined two single domain A3 proteins, A3C and A3H that encode  
338 A3Z2 and A3Z3 domains, respectively, into a single molecule to test the hypothesis that  
339 there is novel antiviral potential in the A3 locus that has not been sampled by nature.  
340 We found that these A3C/A3H double domains can create super restriction factors with  
341 antiviral potency that is at least as potent as A3G both in single-cycle assays and during  
342 spreading infections in T cells. The ability of the A3C/A3H synthetic double domain  
343 proteins to inhibit reverse transcription after viral infection of the target cells, rather than  
344 an increased ability to induce hypermutation, correlates with their increased ability to  
345 inhibit HIV-1 (Figure 3). Thus, it is possible to create novel combinations of A3 domains  
346 with just as potent antiviral activity as A3G that enhance a non-enzymatic mechanism of  
347 action.

348

### 349 Why are A3C/A3H double domains so potently antiviral?

350           Not all novel double domain A3 combinations gain such potent antiviral activity.  
351 We previously showed that linking together two A3H haplotypes to form an A3H-A3H  
352 double domain does not increase antiviral activity [39,40] and linking two A3C domains  
353 together to form A3C-A3C leads to modest increases in antiviral activity (Figure 1 and  
354 [20]). However, here we created heterologous double domains using A3C and A3H and  
355 show that A3C/A3H double domains are over 100-fold more potent than A3C-A3C  
356 (Figure 1B). One possibility is that combining two different evolutionary distinct domains,  
357 such as with A3G being a combination of Z2 and Z1 domains, creates a more potent  
358 restriction factor because each domain has specialized contributions to substrate



359 specificity, binding affinity, deamination activity, and/or packaging into virions, allowing  
360 for independent and additive activities [10]. For example, both A3F and A3G primarily  
361 rely on only the C-terminal domains for catalytic activity, allowing for the N-terminal  
362 domain to perform other aspects involved in restriction [41–43]. The full-length human  
363 A3G structure provides insights about how the two domains interact to form a channel  
364 between the N-terminal and C-terminal domain to form additional affinity to ssDNA  
365 [44,45]. We speculate that having two different Z domains in a double deaminase  
366 domain protein could provide fitness advantages to sub-specialization of each domain.

367       A3C/A3H double domains, unlike their single domain counterparts or even A3G,  
368 restrict HIV-1 primarily through a deaminase-independent mechanism (Figure 3A and  
369 3B). Our data is consistent with the model that these double domains have gained an  
370 ability to interfere with the reverse transcription process, leading to fewer intact HIV-1  
371 integration products (Figure 3C). The deaminase-independent mechanism of inhibition  
372 of HIV-1 could result from cumulative delays in reverse transcriptase products because  
373 of binding the template RNA, binding to negative-strand DNA, and/or binding to reverse  
374 transcriptase, thereby preventing proviral DNA synthesis [28–30,46–48]. A3F and A3G  
375 have been shown to interact with reverse transcriptase to negatively regulate its activity  
376 [27–30,48]. Additionally, dimerization of A3G has been shown to slow the dissociation of  
377 A3G from ssDNA and reduce its scanning ability [49]. A3H requires a double-stranded  
378 RNA to make functional dimers [32–34], but here we show that the binding affinity of the  
379 A3C-A3H double domain to the HIV-1 5'UTR RNA is over 10-fold greater than A3H<sub>hap II</sub>  
380 and over 200-fold greater than A3G (Figure 4). Thus, these data are consistent with the  
381 hypothesis that increased packaging as well as increased affinity for RNA compared to

382 their single domain counterparts is the mechanism by which these super restriction  
383 factors block reverse transcriptase from synthesizing full-length proviral DNA.

384 The major factor mediating interactions between A3s and nucleic acids is the  
385 electrostatic interactions between positively charged amino acids and the negatively  
386 charged nucleic acid phosphate backbone. For A3H<sub>hap II</sub>, the overall charge of the amino  
387 acid sequence at pH 7.5 is +6.3 (<http://protcalc.sourceforge.net/>). In contrast, A3C has  
388 an overall negative charge of -0.7. We hypothesize that the positive charge of the  
389 A3H<sub>hap II</sub> would increase the interaction time of A3C with RNA, similar to what has been  
390 shown for the two A3G domains on RNA and ssDNA [50,51]. However, the two domains  
391 of A3G are more different in charge with the N-terminal domain being +9.9 and the C-  
392 terminal domain being -6.3 at pH 7.5. This correlates with weaker RNA binding for A3G  
393 in comparison to A3C/A3H (Figure 4), which has less disparity between the charge of  
394 the two domains.

395 Furthermore, RNA binding has been implicated for proper subcellular localization  
396 of A3F, A3G, and A3H [32,33,52–58]. Treatment with RNase A can disrupt interactions  
397 between A3s and cellular proteins, hinting at RNA playing an important role in regulating  
398 A3 activities [32–34,59]. A3H<sub>hap I</sub> has been reported to have reduced RNA binding [59]  
399 and could explain why A3C/A3H<sub>hap I</sub> double domains are less active compared to  
400 A3C/A3H<sub>hap II</sub> double domains (Figure 1B). Additionally, as there is a gain in the protein  
401 expression level of A3H<sub>hap I</sub> in the A3C/A3H<sub>hap I</sub> double domains (Figure 1B), this  
402 phenotype could be due to an increase in RNA interactions leading to the gain in  
403 stability of A3H<sub>hap I</sub> chimeras.

404

405 A3C-A3H inhibits HIV-1 $\Delta$ Vif, but not wtHIV-1 in a spreading infection in T cells

406 It has been argued that transient expression of A3 proteins in 293T cells  
407 exaggerates their antiviral activity and that stable expression in T cells is a better  
408 predictor of their true antiviral activity [24]. Here, we tested cells expressing A3C-A3H  
409 against wtHIV-1 and HIV-1 $\Delta$ Vif in spreading infections in Jurkat cells that stably  
410 expressed A3C-A3H and found that these experiments recapitulated the single-cycle  
411 infections, demonstrating that A3C-A3H is as potent as A3G in inhibiting HIV-1 $\Delta$ Vif, but  
412 though a novel, non-catalytic mechanism (Figure 1 and 3). We previously found that an  
413 A3C-A3C synthetic tandem domain protein was relatively resistant to Vif antagonism  
414 [20]. However, in contrast to the HIV-1 $\Delta$ Vif infection, we found that wtHIV-1 (i.e. HIV-1  
415 that expressed Vif) was able to replicate in A3C-A3H-expressing cells to similar levels to  
416 the A3G- and no A3-expressing cells (Figure 5D). Thus, despite A3C-A3H being a novel  
417 target for HIV-1 Vif, this data shows that HIV-1 Vif has the potential to target novel A3  
418 double domains. Vif uses three interfaces to bind to antiviral A3s: one for A3G, another  
419 for A3H, and a third for A3C/A3D/A3F [60]. In the double domain A3C/A3H  
420 combinations, either the A3C or the A3H determinants for Vif degradation must still be  
421 surface-exposed. Future experiments will determine if we can additionally select for  
422 potent super restrictor A3 combinations that are resistant to Vif.

423

424 Why has a A3Z3 never been used in a double domain A3?

425 Despite the potent antiviral activity of A3C/A3H double domains, no primate  
426 genome currently contains a functional double domain A3 containing a Z3 domain [8,9].  
427 Interestingly, no mammalian groups have a detectable Z3 duplication except for in

428 Carnivora, in which the A3Z3 duplication has been almost entirely pseudogenized [9].  
429 These results suggest that Z3 domains may have alternative, harmful deaminase  
430 targets like cellular genomic DNA, precluding their inclusion in highly potent double  
431 domain A3s. A3B and A3H<sub>hap I</sub>, A3s with more nuclear localization, have been  
432 implicated in contributing to cancer, suggesting that they could be detrimental to the  
433 host [61,62]. However, we were able to create cell lines that express A3C-A3H (Figure  
434 5) with no obvious growth defects, although this does not rule out long-term or more  
435 subtle growth defects.

436 Another hypothesis is that generation of a cytidine deaminase-independent  
437 mechanisms of inhibition is inherently less optimal than an antiviral activity based on  
438 hypermutation, and that nature has selected against those A3 combinations of domains  
439 that do not favor enzymatic activity rather than inhibition of reverse transcription. Since  
440 A3-mediated hypermutation leads to broad and permanent inactivation of the viral  
441 genome, this mechanism of inhibition might have been selected. However, because  
442 cells expressing A3C-A3H were able to inhibit viral replication to similar levels as A3G,  
443 this possibility seems less likely. Nevertheless, by making novel tandem domain  
444 proteins not found in mammalian genomes, we have learned that more potent antiviral  
445 activity can be achieved with deaminase-independent mechanisms, such as increase  
446 packaging of A3s into budding virions, increased RNA binding, and inhibition of reverse  
447 transcription. Thus, our data suggest that there is an untapped mechanism of potent  
448 antiviral activity within the A3 locus that could block reverse transcription directly rather  
449 than act through hypermutation.  
450

## 451 **Materials and methods**

### 452 **Plasmid constructs**

453           The plasmids were created using the *A3C* sequence [13] and *A3H<sub>hap I</sub>* [16] and  
454 were designed based on similar alignments as *A3D* and *A3F*, incorporating the naturally  
455 found short linker amino acid sequence between both domains Arg-Asn-Pro (RNP) in  
456 *A3D* and *A3F* as previously described [20]. Hybrid *A3* constructs generated via gene  
457 synthesis (Integrated DNA Technologies, IDT) for both *A3C-A3H<sub>hap I</sub>* and *A3H<sub>hap I</sub>-A3C*.  
458 To create all mutations and the *A3H<sub>hap II</sub>* variants of these *A3C/A3H* double domains,  
459 Site-Directed Mutagenesis using the QuikChange II XL kit (Agilent, #200522-5) was  
460 performed and the mutations were confirmed by sanger sequencing. To convert the  
461 *A3H<sub>hap I</sub>* into *A3H<sub>hap II</sub>*, the following mutations were made: G105R and K121D, using  
462 Site Directed Mutagenesis [16]. Wild-type *A3H<sub>hap II</sub>* behaves the same as *A3H<sub>hap I</sub> R105*  
463 *D121* [39]. To create the active site knockout mutants, mutations were made in both the  
464 N- and C- terminal domains, E68A and E254A, for a catalytically inactive variant. All  
465 constructs have a C-terminal 3XFLAG epitope tag and were cloned into the pcDNA4/TO  
466 vector backbone (Thermo Fisher, #V102020) using restriction sites at EcoRI/XhoI.

### 467 **Cell culture and transfections**

468           Jurkat (ATCC TIB-152) and SUPT1 (ATCC CRL-1942) cells were maintained in  
469 RPMI Medium (Gibco, #11875093), with 10% Fetal Bovine Serum (GE Healthcare,  
470 #SH30910.03), 1% Penicillin Streptomycin (Gibco, #15140122), and 1% HEPES at  
471 37°C, referred to as RPMI complete. HEK293T cells (ATCC CRL-3216) were  
472 maintained in Dulbecco's modified Eagle's medium (Gibco, #11965092) with 10% Fetal  
473 Bovine Serum (GE Healthcare, #SH30910.03), and 1% Penicillin Streptomycin (Gibco,

474 #15140122) at 37°C. The plasmids were transfected into the cells using TransIT-LT1  
475 transfection reagent (Mirus, MIR2304) at a ratio of 3:1 mirus:plasmid.

#### 476 **Single-cycle infectivity assays**

477 Single-cycle infectivity assays were previously described in [18,20]. In short,  
478 293T cells were seeded in 6-well plates at a density of  $1.5 \times 10^5$  cells per mL. 24 hours  
479 later, the cells were transfected with 600ng of *HIV-1 $\Delta$ Env $\Delta$ Vif* provirus (LAI strain),  
480 100ng of *L-VSV-G*, and 100ng of A3 plasmid for all single-cycle infectivity assay unless  
481 otherwise noted. 72 hours post transfection, virus was collected and filtered through a  
482 0.3 micron syringe filter. Virus titers were determined using a SG-PERT assay as  
483 described in [38].  $2 \times 10^4$  SUPT1 cells per well were seeded into a 96 well plate  
484 supplemented with 20 $\mu$ g/mL of DEAE-dextran. All infections were done in technical  
485 triplicate. 72 hours post infection, the cells were lysed with a 1:1 ratio of virus to Bright-  
486 Glo luciferase assay media (Promega, #E2610) and the contents were analyzed on a  
487 luminometer (LUMISTAR Omega, BMG Labtech). Values were normalized to the no A3  
488 samples and graphed on Prism software.

#### 489 **Western blotting**

490 Cells were lysed with NP-40 buffer (0.2M Sodium Chloride, 0.05M Tris pH7.4,  
491 0.5M NP-40 Alternative, 0.001M DTT, Protease Inhibitor Cocktail (Roche Complete  
492 Mini, EDTA-free tablets, 11836170001) 72 hours post transfection. The cell lysates  
493 were centrifuged at 4°C at 1,000 rpm for 10 minutes to remove the nuclei pellet. The  
494 supernatant was transferred to a new set of a tubes and spun down at 13,000 rpm for  
495 10 minutes at 4°C to remove the remaining debris. The supernatant was transferred to a  
496 new set of tubes and lysed in 4X loading dye (Invitrogen, #NP0007) and boiled at 95°C

497 for 10 minutes. The boiled samples were resolved on a 4-12% Bis-Tris gel, transferred  
498 to a nitrocellulose membrane (Bio-Rad, 1620115), and blotted with antibodies to detect  
499 protein levels. Anti-FLAG (Sigma, F3164), and anti-p24gag (NIH-ARP, 3537) antibodies  
500 were used at 1:10,000, and Actin (Sigma, A2066), StarBright Blue 520 Goat Anti-Rabbit  
501 IgG (Bio-Rad, 12005869) and StarBright Blue 700 Goat Anti-Mouse IgG (Bio-Rad,  
502 12005866) were used at a ratio of 1:5,000.

### 503 **Quantification of late reverse transcription products**

504 Quantification of late reverse transcription products was previously described in  
505 [20,63]. In short, cells were harvested 19 hours post-infection and unintegrated cDNA  
506 was collected using the Qiagen mini-prep kit (QIAprep Spin Miniprep Kit, # 27106).  
507 Samples were concentrated using the Zymo DNA Clean and Concentrator-25 kit (Zymo,  
508 D4033). HIV cDNA was amplified with TaqMan gene expression master mix (Applied  
509 Biosystems, 4369016), J1 FWD (late RT F)—  
510 ACAAGCTAGTACCAGTTGAGCCAGATAAG, J2 REV (late RT R) GCCGTG  
511 CGCGCTTCAGCAAGC, and LRT-P (late RT probe)—6-carboxyfluorescein (FAM)-  
512 CAGTGGCGCCCGAACAG GGA-6-carboxytetramethylrhodamine (TAMRA) [64,65].  
513 Data were acquired on an ABI QuantStudio5 real-time (qPCR) machine and analyzed  
514 on Prism software.

### 515 **A3 mediated hypermutation assay**

516 The A3 mediated hypermutation assay was previously described in [20]. In short,  
517 SUPT1 cells were infected with Benzonase-treated HIV-1 $\Delta$ Vif $\Delta$ Env virus pseudotyped  
518 with VSVg and the designated A3. 19 hours later, unintegrated viral cDNA was isolated  
519 using a Qiagen miniprep kit (QIAprep Spin miniprep kit; catalog no. 27106). To

520 determine A3-mediated mutations, we used a barcoded Illumina deep-sequencing  
521 approach as previously described [20,66]. Samples were amplified, quantified, pooled,  
522 purified via gel electrophoresis, and sequenced on an Illumina MiSeq sequencer, using  
523 2x250 paired-end reads.

524 The dms\_tools2 software packaged was used to align sequencing reads and  
525 build consensus sequences for each uniquely tagged DNA molecule [67]. Error-  
526 corrected reads were compared to the target sequence to determine the number,  
527 identity, and surrounding nucleotides of all substitutions in each read. Reads with high  
528 numbers of substitutions (> 10% of non-G nucleotides) at the junction of the two paired-  
529 end reads were removed from the analysis as these substitutions were most often found  
530 to be alignment artifacts. Since A3s are known to cause G-to-A substitutions, we  
531 subsampled our data to specifically at G-to-A substitutions. The data is shown as the  
532 frequency of reads in each sample with a given number of G-to-A mutations (0, 1, 2,  
533 etc., up to 9 and then 10+).

#### 534 **Jurkat T cell lines stably expressing A3 proteins**

535 In order to create constitutively expressed A3 cell lines, the Sleeping Beauty  
536 transposase system [37] was adapted to electroporate Jurkat cells using the Lonza SE  
537 Cell Line kit (Lonza, V4SC-1960). The pSBbi-RP plasmid was a gift from Eric Kowarz  
538 (Addgene plasmid #60513) [68]. *A3G-3XFLAG* was cloned into the *pSBbi-RP* vector  
539 using the NcoI/XbaI restriction sites. *A3C-A3H<sub>hap II</sub>-3XFLAG* was cloned into the *pSBbi-*  
540 *RP* vector using the EcoRV/XbaI restriction sites. Using the Lonza 4D-Nucleofactor  
541 (program 'Jurkat E6.1(NEW)' and pulse code 'CK116'), Jurkat cells were electroporated  
542 with the *pSBbi-RP-A3* and *pCMV(CAT)T7-SB100* (gift from Zsuzsanna Izsvak, Addgene



543 plasmid #34879) [69]. Post electroporation, cells were recovered in RPMI and 24 hours  
544 later, transferred into RPMI supplemented with 0.4 $\mu$ g/mL puromycin for selection. To  
545 further ensure that only electroporated cells survived, cells were flow sorted for  
546 dTomato positive cells and maintained in RPMI media supplemented with 0.2 $\mu$ g/mL  
547 puromycin (Sigma, #P8833) selection. Additionally, cells were sorted for similar CD4  
548 levels, using APC anti-human CD4 (PharMingen, #555349), based on the CD4 levels of  
549 the A3C-A3H<sub>hap II</sub> expressing cells.

### 550 **Spreading Infection**

551 wtHIV-1 (LAI strain) and HIV-1 $\Delta$ Vif virus stocks were created by transfecting  
552 HEK293T cells with 1 $\mu$ g of viral plasmid per well in a 6 well plate. The virus was titered  
553 on the Jurkat stable cell lines, via flow cytometry staining for p24-FITC (Beckman  
554 Coulter, 6604665) positive cells. The stable Jurkat cell lines were then infected at an  
555 MOI of 0.01 and 0.05. Virus and 20 $\mu$ g/mL DEAE-Dextran in RPMI were added to cells,  
556 spinoculated for 30 min at 1100xg, and post infection, fresh RPMI media was added to  
557 the cells. The spreading infection was drawn out for 14 days and performed in triplicate.  
558 The cells were closely monitored, and supernatant samples were taken every 2-3 days.  
559 Reverse transcriptase was quantified in the collected viral supernatant using a SG-  
560 PERT assay [38]. Cell lysates were collected on day 14 and split into two samples.  
561 These cell lysates were run on a western blot to check for A3 protein expression and  
562 used to harvest gDNA (QIAamp DNA Blood mini kit, #51104) for the A3 mediated  
563 hypermutation assay.

### 564 **Steady-state Rotational Anisotropy**

565 For generation of RNA *in vitro*, the HIV 5'-UTR (nucleotides 1–497) was cloned  
566 into pSP72 vector (Promega) using BglII and EcoRI sites under the control of T7  
567 promoter. All constructed plasmids were verified by DNA sequencing. Primers were  
568 obtained from IDT and are reported in Feng et al [70]. Fluorescently labeled RNA was  
569 produced by transcribing pSP72 DNA cut with EcoRI *in vitro* using T7 RNA polymerase  
570 with a nucleotide mixture containing fluorescein-12-UTP (Roche Applied Science).  
571 Steady-state rotational anisotropy reactions (60  $\mu$ L) were conducted in buffer containing  
572 50 mM Tris, pH 7.5, 40 mM KCl, 10 mM MgCl<sub>2</sub>, and 1 mM DTT and contained 10 nM  
573 fluorescein-labeled 5'UTR RNA and increasing amounts of A3 (A3H<sub>hap II</sub>, 0.1–61 nM;  
574 A3C-A3H<sub>hap II</sub>, 0.0045–6.040 nM; and A3G, 0.36202 nM). A QuantaMaster QM-4  
575 spectrofluorometer (Photon Technology International) with a dual emission channel was  
576 used to collect data and calculate anisotropy. Measurements were performed at 21°C.  
577 Samples were excited with vertically polarized light at 495 nm (6-nm band pass), and  
578 vertical and horizontal emissions were measured at 520 nm (6-nm band pass). The  $K_d$   
579 was obtained by fitting to a hyperbolic decay curve equation using SigmaPlot version  
580 11.2 software.

### 581 **Data accessibility**

582 The sequencing reads were uploaded to the NCBI SRA with BioProject  
583 accession number PRJNA643546 for Figure 3 and PRJNA718082 for Figure 5.  
584 The computational pipeline used to analyze the sequencing data and generate Figure 3  
585 and 5 are available on GitHub ([https://github](https://github.com/molliemcdonnell/SuperRestrictionFactor_Hypermutation2)  
586 [.com/molliemcdonnell/SuperRestrictionFactor\\_Hypermutation2](https://github.com/molliemcdonnell/SuperRestrictionFactor_Hypermutation2)).

587

## 588 **Acknowledgements**

589 We thank Molly Ohainle, Jeannette Tenthorey, and Nicholas Chesarino for their helpful  
590 feedback on this manuscript, James Dargan for his assistance with the A3-mediated  
591 hypermutation code, and the Fred Hutchinson Shared Resources Genomic Core. This  
592 work was supported by an NSF predoctoral fellowship (NSF DGE-1762114) to M.M.M.,  
593 NIH/NIAID P50AI150476 (principal investigator [PI], Nevan Krogan; subaward to M.E.),  
594 NIH/NIAID R01 AI030927 to M.E., and Canadian Institutes of Health Research grant  
595 PJT-162407 to L.C.

596

597

## 598 **Figure Legends**

### 599 **Figure 1. A3C/A3H double domains are more potent restriction factors than A3G**

600 (A) Cartoon schematic the A3 gene locus and of the A3C/A3H double domains  
601 synthesized. The Z1 domains are labeled in green, the Z2 domains in purple, and the  
602 Z3 domains in blue (light blue for A3H<sub>hap I</sub> and dark blue for A3H<sub>hap II</sub>). The Z2/Z3 and  
603 Z3/Z2 double domains are A3C-A3H and A3H-A3C, respectively. All double domains  
604 used in these experiments have a C-terminal 3XFLAG tag for western blotting. (B) Top:  
605 Single-cycle infectivity assay measuring the percent infectivity of each A3 variant  
606 against *HIV-1ΔEnvΔVif*. Cells are transfected with 100ng of A3 and 600ng of *HIV-*  
607 *1ΔEnvΔVif* pseudotyped with 100ng of VSV-g. Virus production was normalized and  
608 equal amounts of virus was used to infect SUPT1 cells. Results from each experiment  
609 were normalized to a no A3 control. Bar graph shows an average of 3 biological  
610 replicates, each with triplicate infections (+/- SEM). Statistical differences were

611 determined by unpaired *t* tests: \*\*  $P \leq 0.01$ , ns= not significant. Bottom: Representative  
612 western blot of the intracellular levels of A3 in 293Ts. Antibodies to FLAG were used to  
613 detect A3s and actin was used as a loading control. (C) Top: The % infectivity of *HIV-*  
614 *1ΔEnvΔVif* pseudotyped with *VSV-g* and increasing doses of A3G (grey), A3C-A3H<sub>hap II</sub>  
615 (dark blue), or A3H<sub>hap II</sub>-A3C (light blue) are plotted, normalized to a control with no A3.  
616 The amount of each A3 plasmid transfected in ng is shown on the X-axis. Data points  
617 are an average of 3 biological replicates, with each biological replicate consisting of 3  
618 triplicate infections (+/- SEM). Statistical differences were determined by unpaired *t* tests  
619 between A3G and A3C-A3H<sub>hap II</sub> and A3G and A3H<sub>hap II</sub>-A3C: \*  $P \leq 0.05$ , ns= not  
620 significant. Bottom: Western blot showing the intracellular expression levels of A3G,  
621 A3C-A3H<sub>hap II</sub>, and A3H<sub>hap II</sub>-A3C probed with anti-FLAG antibody showing intracellular  
622 expression levels for A3s and actin as a loading control. The ng of A3 transfected are  
623 denoted on top of the western blot.

624

625 **Figure 2. A3C/A3H double domains are packaged more than their single domain**  
626 **counterparts.**

627 Intracellular expression and packaging of A3 into virions. *HIV-1ΔEnvΔVif* provirus was  
628 co-transfected into 293T cells with 100ng of each A3. Top: western blot of cellular  
629 lysates probed with anti-FLAG antibody showing intracellular expression levels for A3s  
630 and actin as a loading control. Bottom: Western blot of proteins in the pelleted virions  
631 and probed with anti-FLAG antibody for A3 levels and anti-p24gag for normalization. An  
632 empty vector condition was used as a negative control and labeled no A3. A3C-A3H<sub>hap II</sub>  
633 is shortened to A3C-A3H and A3H<sub>hap II</sub>-A3C is shortened A3H-A3C. Western blot shown

634 is representative of 3 biological replicates. The relative abundance of A3 in cell lysates  
635 and virions was quantified with Image Lab. Relative A3 packaged was calculated by  
636 dividing the relative abundance of A3 in the virions by the normalized levels of each A3  
637 expressed in the cells and written below.

638

639 **Figure 3. A3C/A3H double domains use deaminase independent mechanisms to**  
640 **restrict HIV-1**

641 (A) Paired-end sequencing reads were analyzed for G-to-A mutations. Data is shown as  
642 frequency distribution bar graphs of the percent of reads by the number of G-to-A  
643 substitutions in each read for each A3 tested. Plasmid control (referred to as plasmid  
644 ctrl) was used as a sequencing control and a no A3 sample was used to distinguish  
645 background mutations, including reverse transcriptase-induced mutations. A3C-A3H<sub>hap II</sub>  
646 is shortened to A3C-A3H and A3H<sub>hap II</sub>-A3C is shortened A3H-A3C. (B) Single-cycle  
647 infectivity assay measuring the percent infectivity of each A3 variant against *HIV-*  
648 *1ΔEnvΔVif*. A3C-A3H<sub>hap II</sub> is shortened to A3C-A3H and A3H<sub>hap II</sub>-A3C is shortened A3H-  
649 A3C. Catalytic knockouts of the essential glutamic acid in both N- and C- terminal  
650 domains of A3C-A3H<sub>hap II</sub> and A3H<sub>hap II</sub>-A3C (shortened to cat KO) were created and  
651 compared to their catalytically active counterpart. Cells are transfected with 100ng of A3  
652 and 600ng of *HIV-1ΔEnvΔVif* pseudotyped with 100ng of VSV-g. Virus production was  
653 normalized and equal amounts of virus was used to infect SUPT1 cells. Results from  
654 each experiment were normalized to a no A3 control. Bar graph shows an average of 3  
655 biological replicates, each with triplicate infections (+/- SEM). Statistical differences  
656 were determined by unpaired *t* tests: ns= not significant. (C) To evaluate the relative

657 copies of late reverse transcription products, SUPT1 cells were infected with *HIV-*  
658 *1ΔEnvΔVif* and either no A3 or 100ng of A3 to test for inhibition of HIV-1 reverse  
659 transcription. 18 hours later, viral cDNA was harvested and the levels of HIV-1 late  
660 reverse transcription products were assayed by qPCR. Each circle represents a  
661 normalized value for the respective biological replicate, with qPCR technical duplicates.  
662 A3C-A3H<sub>hap II</sub> is shortened to A3C-A3H and A3H<sub>hap II</sub>-A3C is shortened A3H-A3C. Each  
663 sample has been adjusted for equal viral infection and a nevirapine control. Bars  
664 represent the mean across 3 biological replicates.

665

666 **Figure 4. A3C-A3H has increased binding affinity for the HIV-1 5'UTR.**

667 The apparent  $K_d$  of A3 enzymes from the fluorescein labeled 497 nt RNA was analyzed  
668 by steady-state rotational anisotropy for (A) A3C-A3H<sub>hap II</sub> ( $0.03 \pm 0.01$  nM); (B) A3H<sub>hap II</sub>  
669 ( $0.52 \pm 0.18$ ) and (C) A3G ( $6.36 \pm 3.18$ ). The x-axis on each graph is different due to the  
670 different amount of protein added in order to fully saturate the RNA. Error bars  
671 represent the standard deviation from three independent experiments.

672

673 **Figure 5. A3C-A3H suppresses HIV-1ΔVif spreading infection to day 14**

674 (A) Western blot of the Jurkat cells constitutively expressing no A3, A3G, or A3C-A3H<sub>hap</sub>  
675 <sub>II</sub> (shortened to A3C-A3H) probed with anti-FLAG for the A3 levels and actin as a  
676 loading control. (B) Spreading infection kinetics of a replication-competent HIV-1 with a  
677 deletion that spans the Vif open reading frame (called HIV-1ΔVif). The Jurkat cells  
678 expressing no A3 (circles, grey line), A3G (squares, green line), or A3C-A3H<sub>hap II</sub>  
679 (shortened to A3C-A3H, triangles, purple line) were infected at a low MOI (MOI=0.01) in

680 triplicates. Virus production was monitored over time by collecting supernatant and  
681 measuring RT activity (mU/mL) using a SG-PERT assay. Error bars represent the  
682 standard error across the 3 biological replicates. To compare spreading infection  
683 kinetics, area under the curve (AUC) was calculated for each biological replicate. The  
684 mean AUC and standard error of the mean are represented to the right. (C) A3  
685 mediated hypermutation analysis of gDNA from cells harvested on day 14. Paired-end  
686 sequencing reads were analyzed for G-to-A mutations. Data is shown as frequency  
687 distribution bar graphs of the percent of reads by the number of G-to-A substitutions in  
688 each read for each A3 tested. Plasmid control was used as a sequencing control and a  
689 no A3 sample was used to distinguish mutations that occurred throughout the 14-day  
690 time course. Frequencies are calculated as the average frequency of each biological  
691 infection replicates and read counts are shown as the sum of the reads for each  
692 replicate. (D) Spreading infection kinetics of a replication-competent wtHIV-1 (LAI  
693 isolate). Jurkat cells expressing no A3 (circles, grey line), A3G (squares, green line),  
694 and A3C-A3H<sub>hap II</sub> (shortened to A3C-A3H, triangles, purple line) were infected in  
695 triplicate at a low MOI (MOI=0.01). Virus production was monitored over time by  
696 collecting supernatant and measuring RT activity (mU/mL) using a SG-PERT assay.  
697 Error bars represent the standard error across the 3 biological replicates. To compare  
698 spreading infection kinetics, area under the curve (AUC) was calculated for each  
699 biological replicate. The mean AUC and standard error of the mean are represented to  
700 the right. (E) Western blot of cell lysates collected on day 14 from HIV-1 $\Delta$ Vif infection  
701 (B), shortened to  $\Delta$ Vif, and from wtHIV-1 infection (D), shortened to wt. Cells expressing  
702 A3G or A3C-A3H<sub>hap II</sub> were evaluated for their intracellular expression levels of A3 in

703 each of the triplicate infections. The anti-FLAG antibody was used to probe for the  
704 FLAG tagged A3s and actin was used as a loading control.

705

## 706 **References**

- 707 1. Daugherty MD, Malik HS. Rules of engagement: Molecular insights from host-  
708 virus arms races. *Annu Rev Genet.* 2012;46: 677–700. doi:10.1146/annurev-  
709 genet-110711-155522
- 710 2. Duggal NK, Emerman M. Evolutionary conflicts between viruses and restriction  
711 factors shape immunity. *Nat Rev Immunol.* 2012;12: 687–695.  
712 doi:10.1038/nri3295
- 713 3. Schilling M, Bulli L, Weigang S, Graf L, Naumann S, Patzina C, et al. Human MxB  
714 Protein Is a Pan-herpesvirus Restriction Factor. *J Virol.* 2018;92: 1–11.  
715 doi:10.1128/jvi.01056-18
- 716 4. Verhelst J, Hulpiau P, Saelens X. Mx Proteins: Antiviral Gatekeepers That  
717 Restrain the Uninvited. *Microbiol Mol Biol Rev.* 2013;77: 551–566.  
718 doi:10.1128/membr.00024-13
- 719 5. Liu Z, Pan Q, Ding S, Qian J, Xu F, Zhou J, et al. The interferon-inducible MxB  
720 protein inhibits HIV-1 infection. *Cell Host Microbe.* 2013;14: 398–410.  
721 doi:10.1016/j.chom.2013.08.015
- 722 6. Goujon C, Moncorgé O, Bauby H, Doyle T, Ward CC, Schaller T, et al. Human  
723 MX2 is an interferon-induced post-entry inhibitor of HIV-1 infection. *Nature.*  
724 2013;502: 559–562. doi:10.1038/nature12542
- 725 7. Tareen SU, Sawyer SL, Malik HS, Emerman M. An expanded clade of rodent



- 726 Trim5 genes. *Virology*. 2009;385: 473–483. doi:10.1016/j.virol.2008.12.018
- 727 8. Münk C, Willemsen A, Bravo IG. An ancient history of gene duplications, fusions  
728 and losses in the evolution of APOBEC3 mutators in mammals. *BMC Evol Biol*.  
729 2012;12: 71. doi:10.1186/1471-2148-12-71
- 730 9. Ito J, Gifford RJ, Sato K. Retroviruses drive the rapid evolution of mammalian  
731 APOBEC3 genes. *Proc Natl Acad Sci U S A*. 2020;117: 610–618.  
732 doi:10.1073/pnas.1914183116
- 733 10. LaRue RS, Andresdottir V, Blanchard Y, Conticello SG, Derse D, Emerman M, et  
734 al. Guidelines for Naming Nonprimate APOBEC3 Genes and Proteins. *J Virol*.  
735 2008;83: 494–497. doi:10.1128/jvi.01976-08
- 736 11. Yang L, Emerman M, Malik HS, McLaughlin Jnr RN. Retrocopying expands the  
737 functional repertoire of APOBEC3 antiviral proteins in primates. *Elife*. 2020;9: 1–  
738 18. doi:10.7554/eLife.58436
- 739 12. Sawyer SL, Emerman M, Malik HS. Ancient adaptive evolution of the primate  
740 antiviral DNA-editing enzyme APOBEC3G. *PLoS Biol*. 2004;2.  
741 doi:10.1371/journal.pbio.0020275
- 742 13. Wittkopp CJ, Adolph MB, Wu LI, Chelico L, Emerman M. A Single Nucleotide  
743 Polymorphism in Human APOBEC3C Enhances Restriction of Lentiviruses. *PLoS*  
744 *Pathog*. 2016;12: 1–24. doi:10.1371/journal.ppat.1005865
- 745 14. Ebrahimi D, Richards CM, Carpenter MA, Wang J, Ikeda T, Becker JT, et al.  
746 Genetic and mechanistic basis for APOBEC3H alternative splicing, retrovirus  
747 restriction, and counteraction by HIV-1 protease. *Nat Commun*. 2018;9: 1–11.  
748 doi:10.1038/s41467-018-06594-3

- 749 15. Ohainle M, Kerns J a, Malik HS, Emerman M. Adaptive Evolution and Antiviral  
750 Activity of the Conserved Mammalian Cytidine Deaminase APOBEC3H. *J Virol.*  
751 2006;80: 3853–3862. doi:10.1128/JVI.80.8.3853
- 752 16. Ohainle M, Kerns JA, Li MMH, Malik HS, Emerman M. Antiretroelement Activity of  
753 APOBEC3H Was Lost Twice in Recent Human Evolution. *Cell Host Microbe.*  
754 2008;4: 249–259. doi:10.1016/j.chom.2008.07.005
- 755 17. Refsland EW, Hultquist JF, Luengas EM, Ikeda T, Shaban NM, Law EK, et al.  
756 Natural Polymorphisms in Human APOBEC3H and HIV-1 Vif Combine in Primary  
757 T Lymphocytes to Affect Viral G-to-A Mutation Levels and Infectivity. *PLoS Genet.*  
758 2014;10. doi:10.1371/journal.pgen.1004761
- 759 18. Li MMH, Wu LI, Emerman M. The Range of Human APOBEC3H Sensitivity to  
760 Lentiviral Vif Proteins. *J Virol.* 2010;84: 88–95. doi:10.1128/jvi.01344-09
- 761 19. Colón-Thillet R, Hsieh E, Graf L, McLaughlin RN, Young JM, Kochs G, et al.  
762 Combinatorial mutagenesis of rapidly evolving residues yields super-restrictor  
763 antiviral proteins. *PLOS Biol.* 2019;17: e3000181.  
764 doi:10.1371/journal.pbio.3000181
- 765 20. McDonnell MM, Crawford KHD, Dingens AS, Bloom JD, Emerman M.  
766 APOBEC3C Tandem Domain Proteins Create Super Restriction Factors Against  
767 HIV-1. *MBio.* 2020;11: 1–18.
- 768 21. Tenthorey JL, Young C, Sodeinde A, Emerman M, Malik HS. Mutational resilience  
769 of antiviral restriction favors primate TRIM5 $\alpha$  in host-virus evolutionary arms  
770 races. *Elife.* 2020;9: 1–36. doi:10.1101/2020.06.12.149088
- 771 22. Nakano Y, Aso H, Soper A, Yamada E, Moriwaki M, Juarez-Fernandez G, et al. A

- 772 conflict of interest: the evolutionary arms race between mammalian APOBEC3  
773 and lentiviral Vif. *Retrovirology*. 2017;14: 31. doi:10.1186/s12977-017-0355-4
- 774 23. Li J, Chen Y, Li M, Carpenter MA, McDougle RM, Luengas EM, et al. APOBEC3  
775 multimerization correlates with HIV-1 packaging and restriction activity in living  
776 cells. *J Mol Biol*. 2014;426: 1296–1307. doi:10.1016/j.jmb.2013.12.014
- 777 24. Hultquist JF, Lengyel JA, Refsland EW, LaRue RS, Lackey L, Brown WL, et al.  
778 Human and Rhesus APOBEC3D, APOBEC3F, APOBEC3G, and APOBEC3H  
779 Demonstrate a Conserved Capacity To Restrict Vif-Deficient HIV-1. *J Virol*.  
780 2011;85: 11220–11234. doi:10.1128/jvi.05238-11
- 781 25. Harris RS, Dudley JP. APOBECs and virus restriction. *Virology*. 2015;479–480:  
782 131–145. doi:10.1016/j.virol.2015.03.012
- 783 26. Gillick K, Pollpeter D, Phalora P, Kim E-Y, Wolinsky SM, Malim MH. Suppression  
784 of HIV-1 Infection by APOBEC3 Proteins in Primary Human CD4 + T Cells Is  
785 Associated with Inhibition of Processive Reverse Transcription as Well as  
786 Excessive Cytidine Deamination. *J Virol*. 2013;87: 1508–1517.  
787 doi:10.1128/jvi.02587-12
- 788 27. Newman ENC, Holmes RK, Craig HM, Klein KC, Lingappa JR, Malim MH, et al.  
789 Antiviral Function of APOBEC3G Can Be Dissociated from Cytidine Deaminase  
790 Activity. *Curr Biol*. 2005;15: 166–170. doi:10.1016/j
- 791 28. Pollpeter D, Parsons M, Sobala AE, Coxhead S, Lang RD, Bruns AM, et al. Deep  
792 sequencing of HIV-1 reverse transcripts reveals the multifaceted antiviral  
793 functions of APOBEC3G. *Nat Microbiol*. 2018;3. doi:10.1038/s41564-017-0063-9
- 794 29. Bishop KN, Verma M, Kim EY, Wolinsky SM, Malim MH. APOBEC3G inhibits

- 795 elongation of HIV-1 reverse transcripts. *PLoS Pathog.* 2008;4: 13–20.  
796 doi:10.1371/journal.ppat.1000231
- 797 30. Iwatani Y, Chan DSB, Wang F, Maynard KS, Sugiura W, Gronenborn AM, et al.  
798 Deaminase-independent inhibition of HIV-1 reverse transcription by APOBEC3G.  
799 *Nucleic Acids Res.* 2007;35: 7096–7108. doi:10.1093/nar/gkm750
- 800 31. Feng Y, Wong L, Morse M, Rouzina I, Williams MC, Chelico L. RNA-Mediated  
801 Dimerization of the Human Deoxycytidine Deaminase APOBEC3H Influences  
802 Enzyme Activity and Interaction with Nucleic Acids. *J Mol Biol.* 2018;430: 4891–  
803 4907. doi:10.1016/j.jmb.2018.11.006
- 804 32. Ito F, Yang H, Xiao X, Li S, Wolfe A, Zirkle B. Understanding the Structure,  
805 Multimerization, Subcellular Localization and mC Selectivity of a Genomic Mutator  
806 and Anti-HIV Factor APOBEC3H. *Sci Rep.* 2018; 1–15. doi:10.1038/s41598-018-  
807 21955-0
- 808 33. Shaban NM, Shi K, Lauer K V., Carpenter MA, Richards CM, Salamango D, et al.  
809 The Antiviral and Cancer Genomic DNA Deaminase APOBEC3H Is Regulated by  
810 an RNA-Mediated Dimerization Mechanism. *Mol Cell.* 2018;69: 75-86.e9.  
811 doi:10.1016/j.molcel.2017.12.010
- 812 34. Bohn JA, Thummar K, York A, Raymond A, Brown WC, Bieniasz PD, et al.  
813 APOBEC3H structure reveals an unusual mechanism of interaction with duplex  
814 RNA. *Nat Commun.* 2017;8: 2–10. doi:10.1038/s41467-017-01309-6
- 815 35. Baig TT, Feng Y, Chelico L. Determinants of Efficient Degradation of APOBEC3  
816 Restriction Factors by HIV-1 Vif. *J Virol.* 2014;88: 14380–14395.  
817 doi:10.1128/jvi.02484-14

- 818 36. Jameson DM, Ross JA. Fluorescence Polarization/Anisotropy in Diagnostics and  
819 Imaging. *Chem Rev.* 2010;110: 2685–2708. doi:10.1021/cr900267p
- 820 37. Ivics ZN, Hackett PB, Plasterk RH, Izsvá Z. Molecular Reconstruction of Sleeping  
821 Beauty, a Tc1-like Transposon from Fish, and Its Transposition in Human Cells.  
822 *Cell.* 1997;91: 501–510.
- 823 38. Vermeire J, Naessens E, Vanderstraeten H, Landi A, Iannucci V, van Nuffel A, et  
824 al. Quantification of Reverse Transcriptase Activity by Real-Time PCR as a Fast  
825 and Accurate Method for Titration of HIV, Lenti- and Retroviral Vectors. *PLoS*  
826 *One.* 2012;7. doi:10.1371/journal.pone.0050859
- 827 39. Li MMH, Emerman M. Polymorphism in human APOBEC3H affects a phenotype  
828 dominant for subcellular localization and antiviral activity. *J Virol.* 2011;85: 8197–  
829 8207. doi:10.1128/JVI.00624-11
- 830 40. Chesarino NM, Emerman M. Polymorphisms in human APOBEC3H differentially  
831 regulate ubiquitination and antiviral activity. *Viruses.* 2020;12.  
832 doi:10.3390/v12040378
- 833 41. Navarro F, Bollman B, Chen H, König R, Yu Q, Chiles K, et al. Complementary  
834 function of the two catalytic domains of APOBEC3G. *Virology.* 2005;333: 374–  
835 386. doi:10.1016/j.virol.2005.01.011
- 836 42. Hache G, Liddament MT, Harris RS. The Retroviral Hypermutation Specificity of  
837 APOBEC3F and APOBEC3G Is Governed by the C-terminal DNA Cytosine  
838 Deaminase Domain. *J Biol Chem.* 2005;280: 10920–10924.  
839 doi:10.1074/jbc.M500382200
- 840 43. Feng Y, Chelico L. Intensity of Deoxycytidine Deamination of HIV-1 Proviral DNA

- 841 by the Retroviral Restriction Factor APOBEC3G Is Mediated by the Noncatalytic  
842 Domain. *J Biol Chem.* 2011;286: 11415–11426. doi:10.1074/jbc.M110.199604
- 843 44. Maiti A, Myint W, Delviks-Frankenberry KA, Hou S, Kanai T, Balachandran V, et  
844 al. Crystal Structure of a Soluble APOBEC3G Variant Suggests ssDNA to Bind in  
845 a Channel that Extends between the Two Domains. *J Mol Biol.* 2020;432: 6042–  
846 6060. doi:10.1016/j.jmb.2020.10.020
- 847 45. Yang H, Ito F, Wolfe AD, Li S, Mohammadzadeh N, Love RP, et al.  
848 Understanding the structural basis of HIV-1 restriction by the full length double-  
849 domain APOBEC3G. *Nat Commun.* 2020;11. doi:10.1038/s41467-020-14377-y
- 850 46. Adolph MB, Webb J, Chelico L. Retroviral Restriction Factor APOBEC3G Delays  
851 the Initiation of DNA Synthesis by HIV-1 Reverse Transcriptase. *PLoS One.*  
852 2013;8. doi:10.1371/journal.pone.0064196
- 853 47. Adolph MB, Ara A, Chelico L. APOBEC3 Host Restriction Factors of HIV-1 Can  
854 Change the Template Switching Frequency of Reverse Transcriptase. *J Mol Biol.*  
855 2019;431: 1339–1352. doi:10.1016/j.jmb.2019.02.015
- 856 48. Holmes RK, Koning FA, Bishop KN, Malim MH. APOBEC3F can inhibit the  
857 accumulation of HIV-1 reverse transcription products in the absence of  
858 hypermutation: Comparisons with APOBEC3G. *J Biol Chem.* 2007;282: 2587–  
859 2595. doi:10.1074/jbc.M607298200
- 860 49. Morse M, Huo R, Feng Y, Rouzina I, Chelico L, Williams MC. Dimerization  
861 regulates both deaminase-dependent and deaminase-independent HIV-1  
862 restriction by APOBEC3G. *Nat Commun.* 2017;8: 597. doi:10.1038/s41467-017-  
863 00501-y

- 864 50. Morse M, Nauffer MN, Feng Y, Chelico L, Rouzina I, Williams MC. HIV restriction  
865 factor APOBEC3G binds in multiple steps and conformations to search and  
866 deaminate single-stranded DNA. *Elife*. 2019;8: 1–23. doi:10.7554/eLife.52649
- 867 51. Chelico L, Prochnow C, Erie DA, Chen XS, Goodman MF. Structural model for  
868 deoxycytidine deamination mechanisms of the HIV-1 inactivation enzyme  
869 APOBEC3G. *J Biol Chem*. 2010;285: 16195–16205.  
870 doi:10.1074/jbc.M110.107987
- 871 52. Gallois-montbrun S, Holmes RK, Swanson CM, Ferna M, Byers HL, Ward MA, et  
872 al. Comparison of Cellular Ribonucleoprotein Complexes Associated with the  
873 APOBEC3F and APOBEC3G Antiviral Proteins. *J Virol*. 2008;82: 5636–5642.  
874 doi:10.1128/JVI.00287-08
- 875 53. Izumi T, Burdick R, Shigemi M, Plisov S, Hu W-S, Pathak VK. Mov10 and  
876 APOBEC3G localization to processing bodies is not required for virion  
877 incorporation and antiviral activity. *J Virol*. 2013;87: 11047–62.  
878 doi:10.1128/JVI.02070-13
- 879 54. Kozak SL, Marin M, Rose KM, Bystrom C, Kabat D. The anti-HIV-1 editing  
880 enzyme APOBEC3G binds HIV-1 RNA and messenger RNAs that shuttle  
881 between polysomes and stress granules. *J Biol Chem*. 2006;281: 29105–29119.  
882 doi:10.1074/jbc.M601901200
- 883 55. Phalora PK, Sherer NM, Wolinsky SM, Swanson CM, Malim MH. HIV-1  
884 Replication and APOBEC3 Antiviral Activity Are Not regulated by P bodies. *J*  
885 *Virol*. 2012;86: 11712–11724. doi:10.1128/JVI.00595-12
- 886 56. Wichroski MJ, Robb GB, Rana TM. Human Retroviral Host Restriction Factors

- 887 APOBEC3G and APOBEC3F Localize to mRNA Processing Bodies. PLOS  
888 Pathog. 2006;2: 374–383. doi:10.1371/journal.ppat.0020041
- 889 57. Stenglein MD, Matsuo H, Harris RS. Two Regions within the Amino-Terminal Half  
890 of APOBEC3G Cooperate To Determine Cytoplasmic Localization. J Virol.  
891 2008;82: 9591–9599. doi:10.1128/jvi.02471-07
- 892 58. Salamango DJ, Becker JT, Mccann JL, Cheng AZ, Demir Ö. APOBEC3H  
893 Subcellular Localization Determinants Define Zipcode for Targeting HIV-1 for  
894 Restriction. Mol Cell Biol. 2018;38: 1–17.
- 895 59. Zhen A, Du J, Zhou X, Xiong Y, Yu XF. Reduced APOBEC3H variant anti-viral  
896 activities are associated with altered RNA binding activities. PLoS One. 2012;7:  
897 1–10. doi:10.1371/journal.pone.0038771
- 898 60. Desimmie BA, Delviks-Frankenberry KA, Burdick RC, Qi D, Izumi T, Pathak VK.  
899 Multiple APOBEC3 restriction factors for HIV-1 and one vif to rule them all. J Mol  
900 Biol. 2014;426: 1220–1245. doi:10.1016/j.jmb.2013.10.033
- 901 61. Starrett GJ, Luengas EM, McCann JL, Ebrahimi D, Temiz NA, Love RP, et al. The  
902 DNA cytosine deaminase APOBEC3H haplotype I likely contributes to breast and  
903 lung cancer mutagenesis. Nat Commun. 2016;7: 12918.  
904 doi:10.1038/ncomms12918
- 905 62. Burns MB, Temiz NA, Harris RS. Evidence for APOBEC3B mutagenesis in  
906 multiple human cancers. Nat Genet. 2013;45: 977–983. doi:10.1038/ng.2701
- 907 63. Ohainle M, Kim K, Komurlu Keceli S, Felton A, Campbell E, Luban J, et al.  
908 TRIM34 restricts HIV-1 and SIV capsids in a TRIM5 $\alpha$ -dependent manner. PLOS  
909 Pathog. 2020;16: e1008507. doi:10.1371/journal.ppat.1008507



- 910 64. De Iaco A, Luban J. Inhibition of HIV-1 infection by TNPO3 depletion is  
911 determined by capsid and detectable after viral cDNA enters the nucleus.  
912 *Retrovirology*. 2011;8: 98. doi:10.1186/1742-4690-8-98
- 913 65. Butler SL, Hansen MST, Bushman FD. A quantitative assay for HIV DNA  
914 integration in vivo. *Nat Med*. 2001;7: 631–634. doi:10.1038/87979
- 915 66. Doud MB, Bloom JD. Accurate Measurement of the Effects of All Amino-Acid  
916 Mutations on Influenza Hemagglutinin. *Viruses*. 2016;8. doi:10.3390/v8060155
- 917 67. Bloom JD. Software for the analysis and visualization of deep mutational scanning  
918 data. *BMC Bioinformatics*. 2015;16: 1–13. doi:10.1186/s12859-015-0590-4
- 919 68. Kowarz E, Löscher D, Marschalek R. Optimized Sleeping Beauty transposons  
920 rapidly generate stable transgenic cell lines. *Biotechnol J*. 2015;10: 647–653.  
921 doi:10.1002/biot.201400821
- 922 69. Mátés L, Chuah MKL, Belay E, Jerchow B, Manoj N, Acosta-Sanchez A, et al.  
923 Molecular evolution of a novel hyperactive Sleeping Beauty transposase enables  
924 robust stable gene transfer in vertebrates. *Nat Genet*. 2009;41: 753–761.  
925 doi:10.1038/ng.343
- 926 70. Feng Y, Love RP, Ara A, Baig TT, Adolph MB, Chelico L. Natural polymorphisms  
927 and Oligomerization of Human APOBEC3H contribute to single-stranded DNA  
928 scanning ability. *J Biol Chem*. 2015;290: 27188–27203.  
929 doi:10.1074/jbc.M115.666065
- 930

**Figure 1**

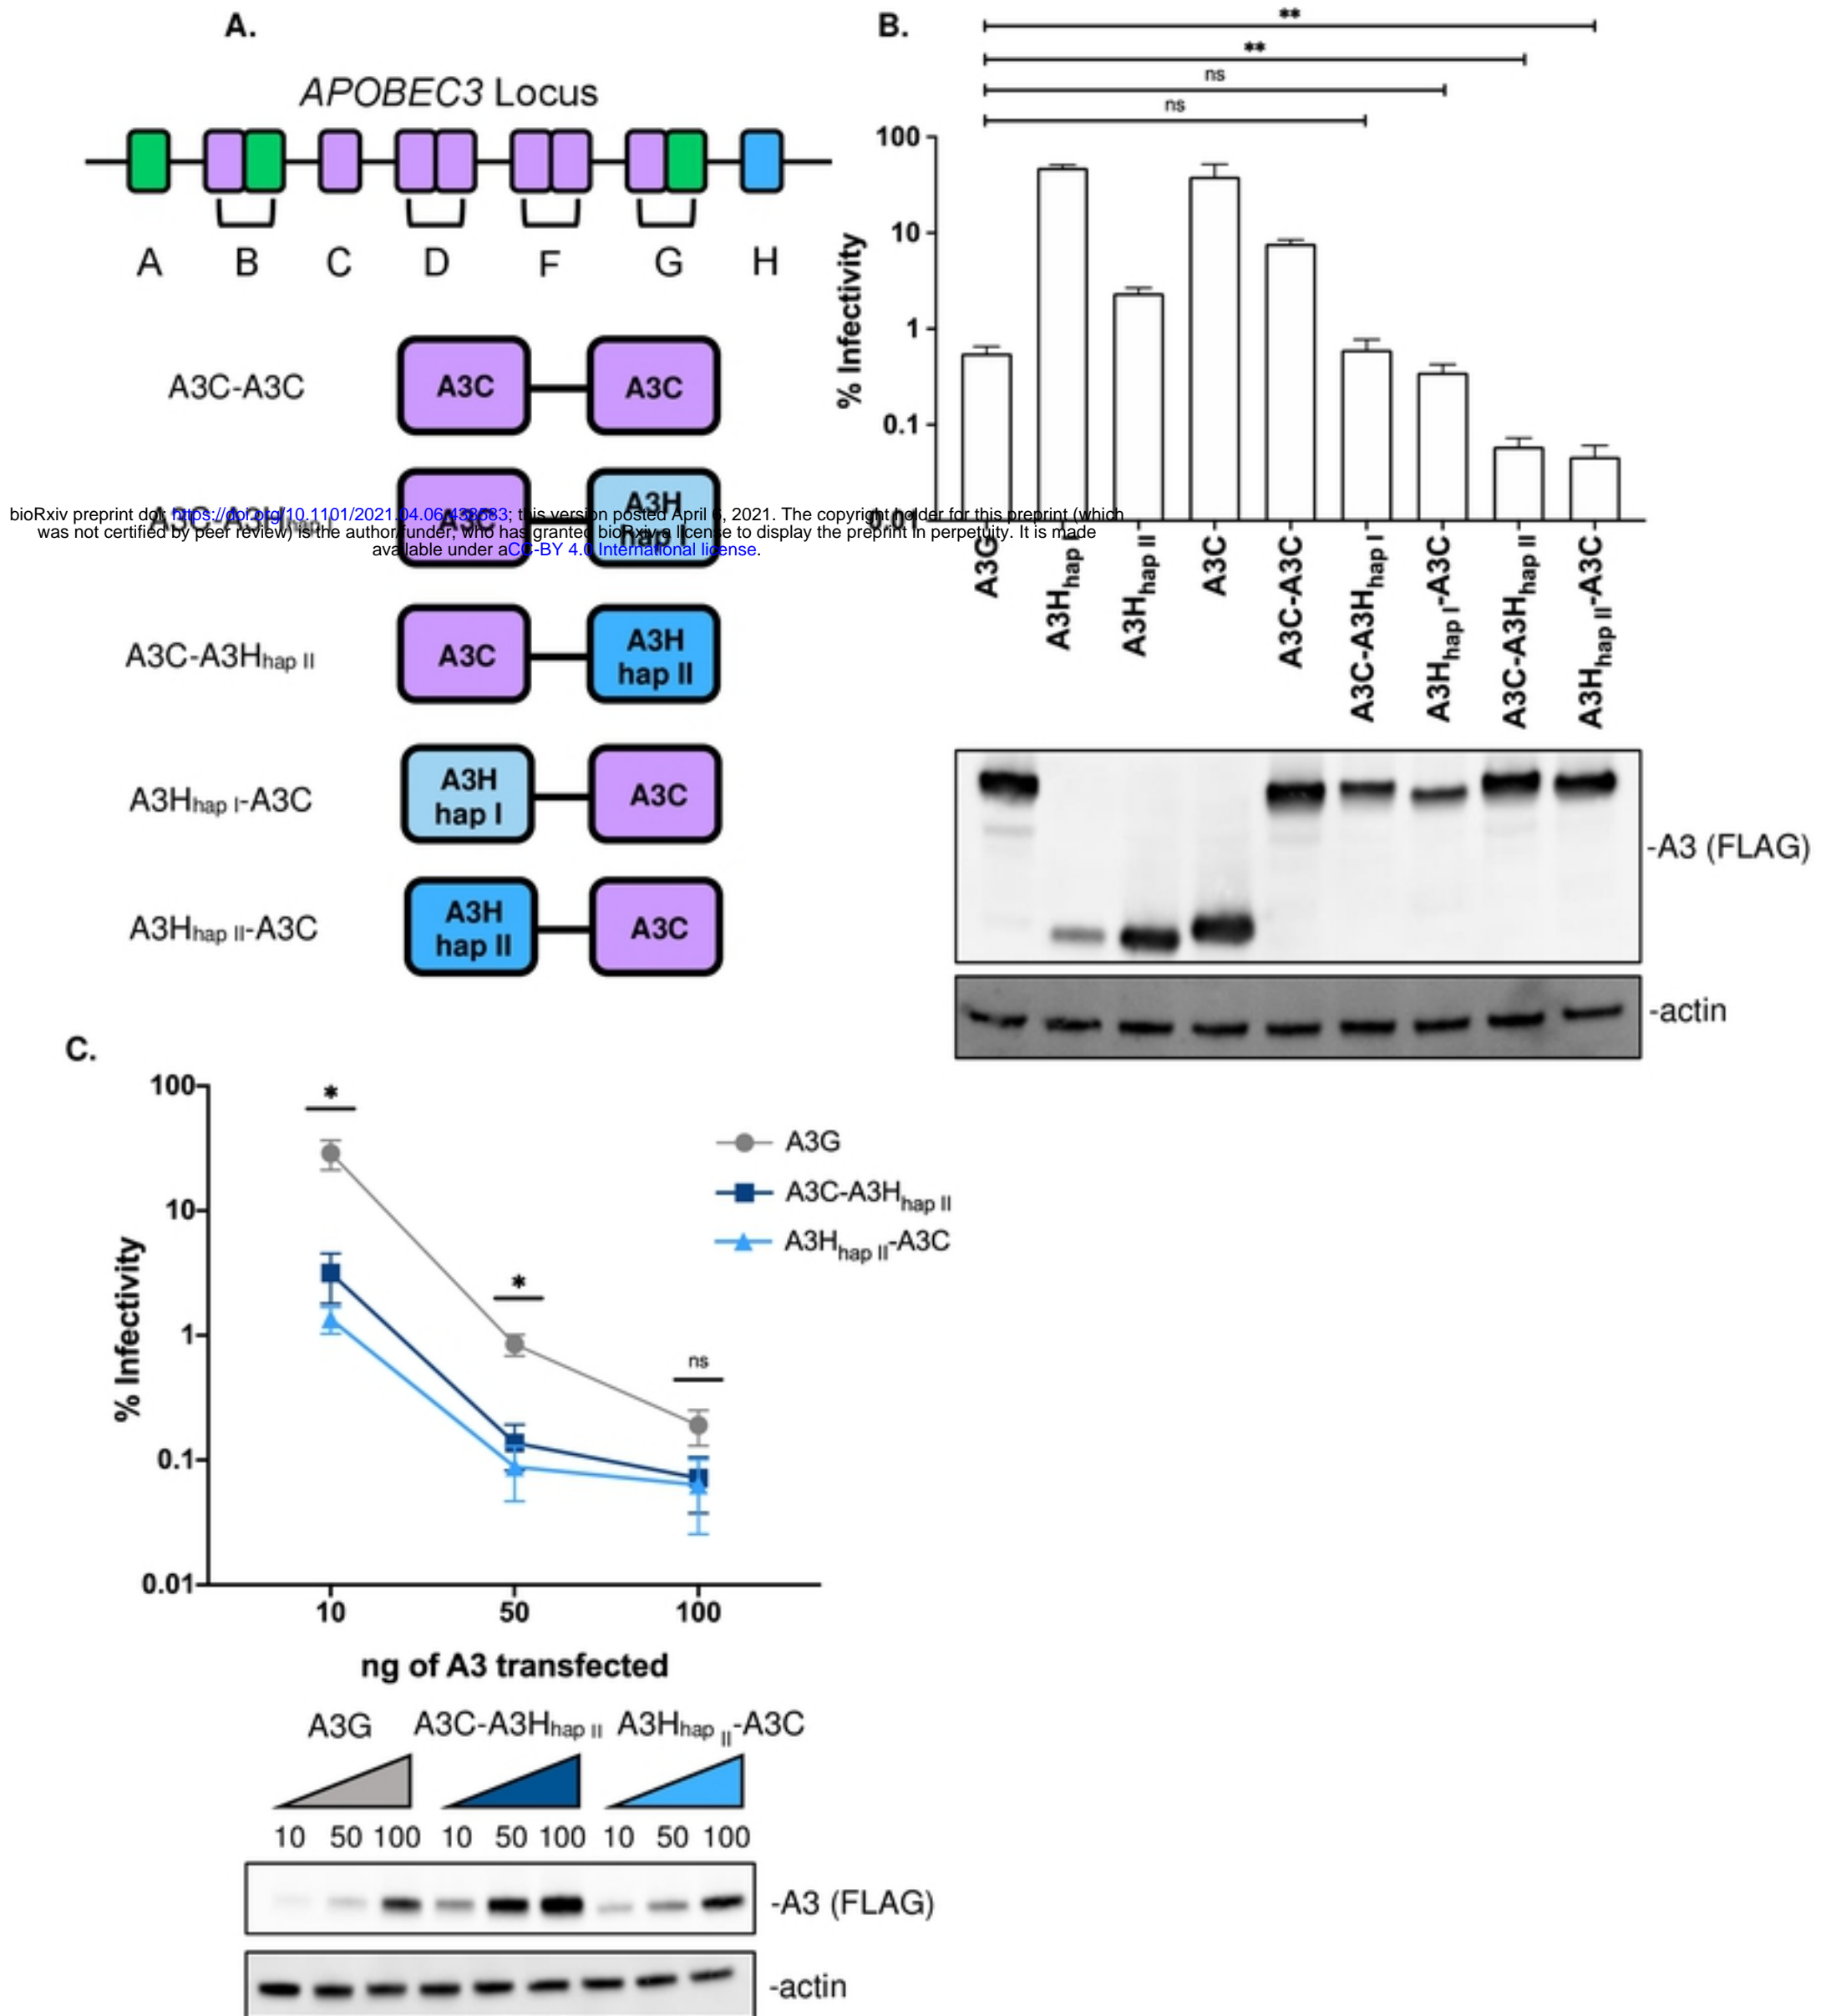

Figure 2

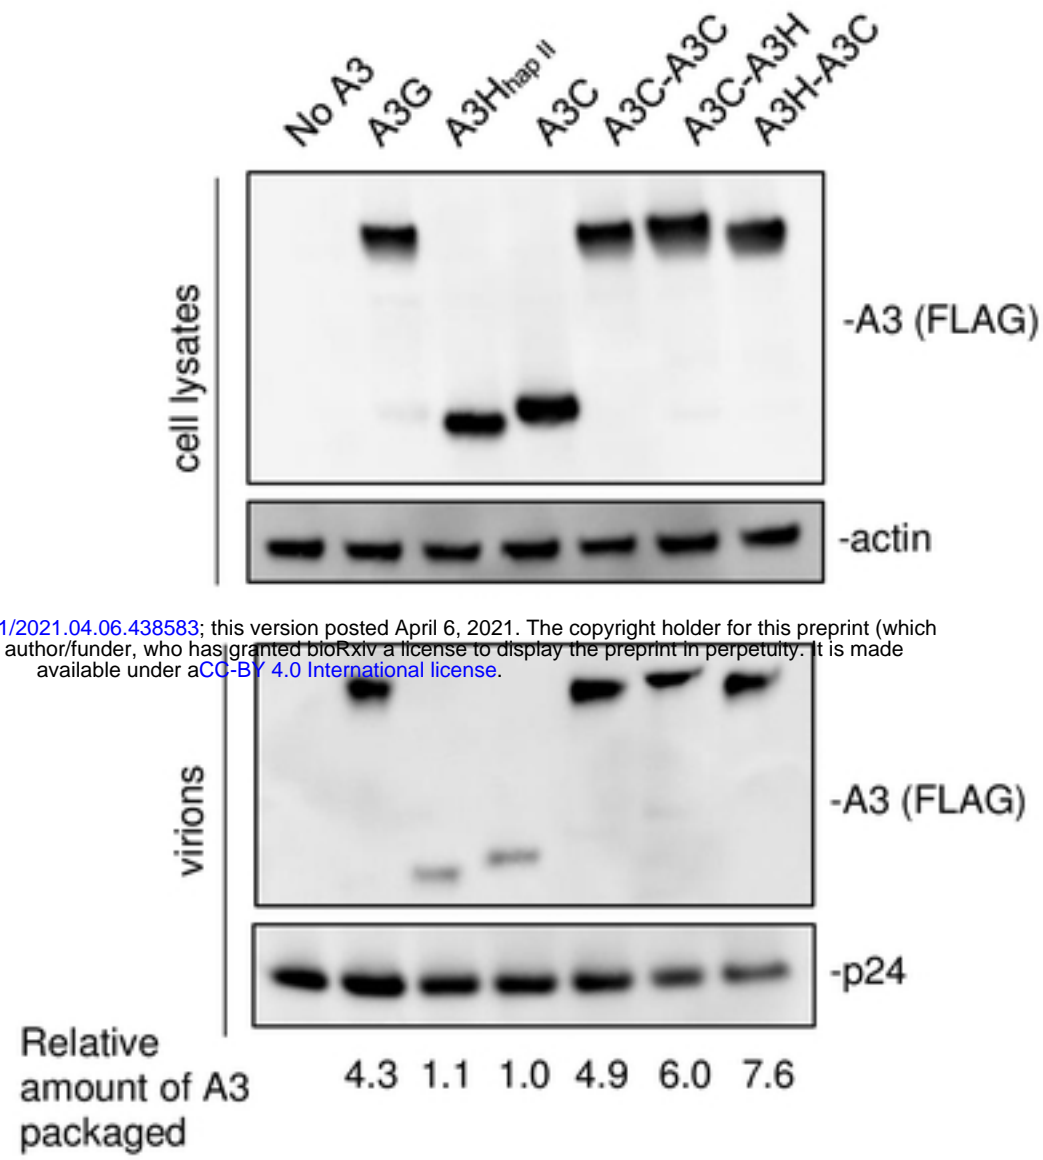

bioRxiv preprint doi: <https://doi.org/10.1101/2021.04.06.438583>; this version posted April 6, 2021. The copyright holder for this preprint (which was not certified by peer review) is the author/funder, who has granted bioRxiv a license to display the preprint in perpetuity. It is made available under aCC-BY 4.0 International license.

**Figure 3**

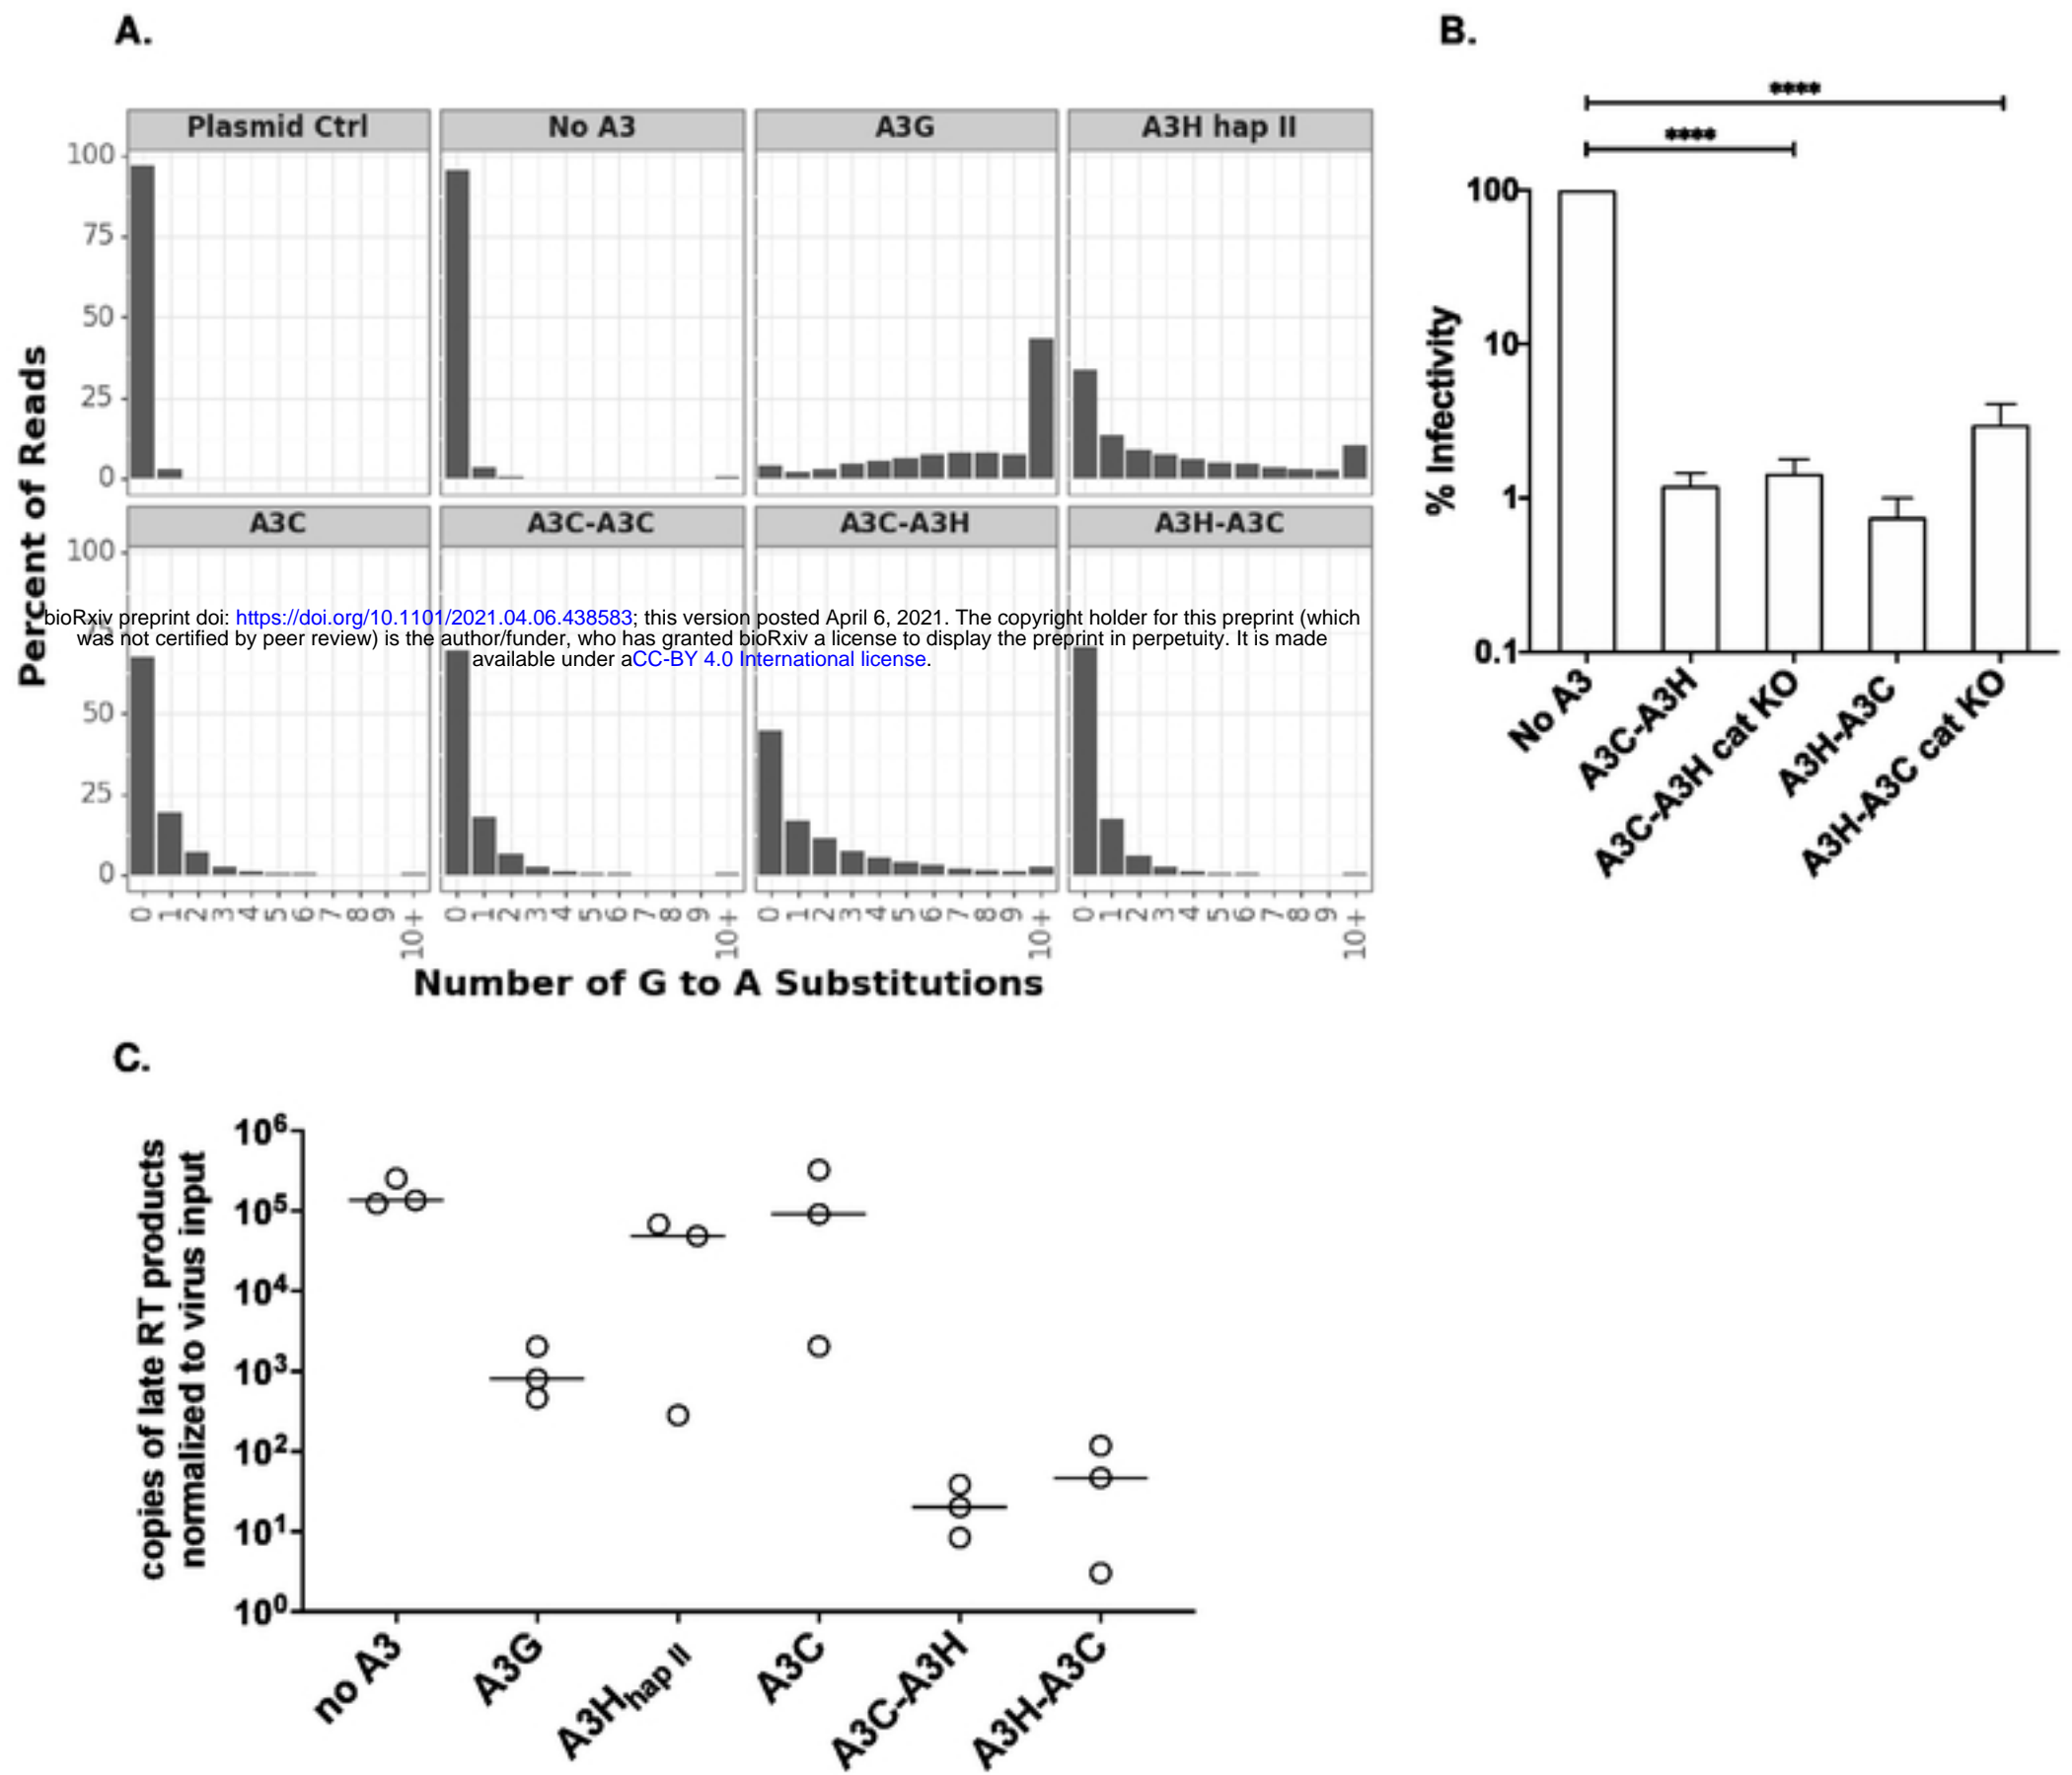

Figure 4

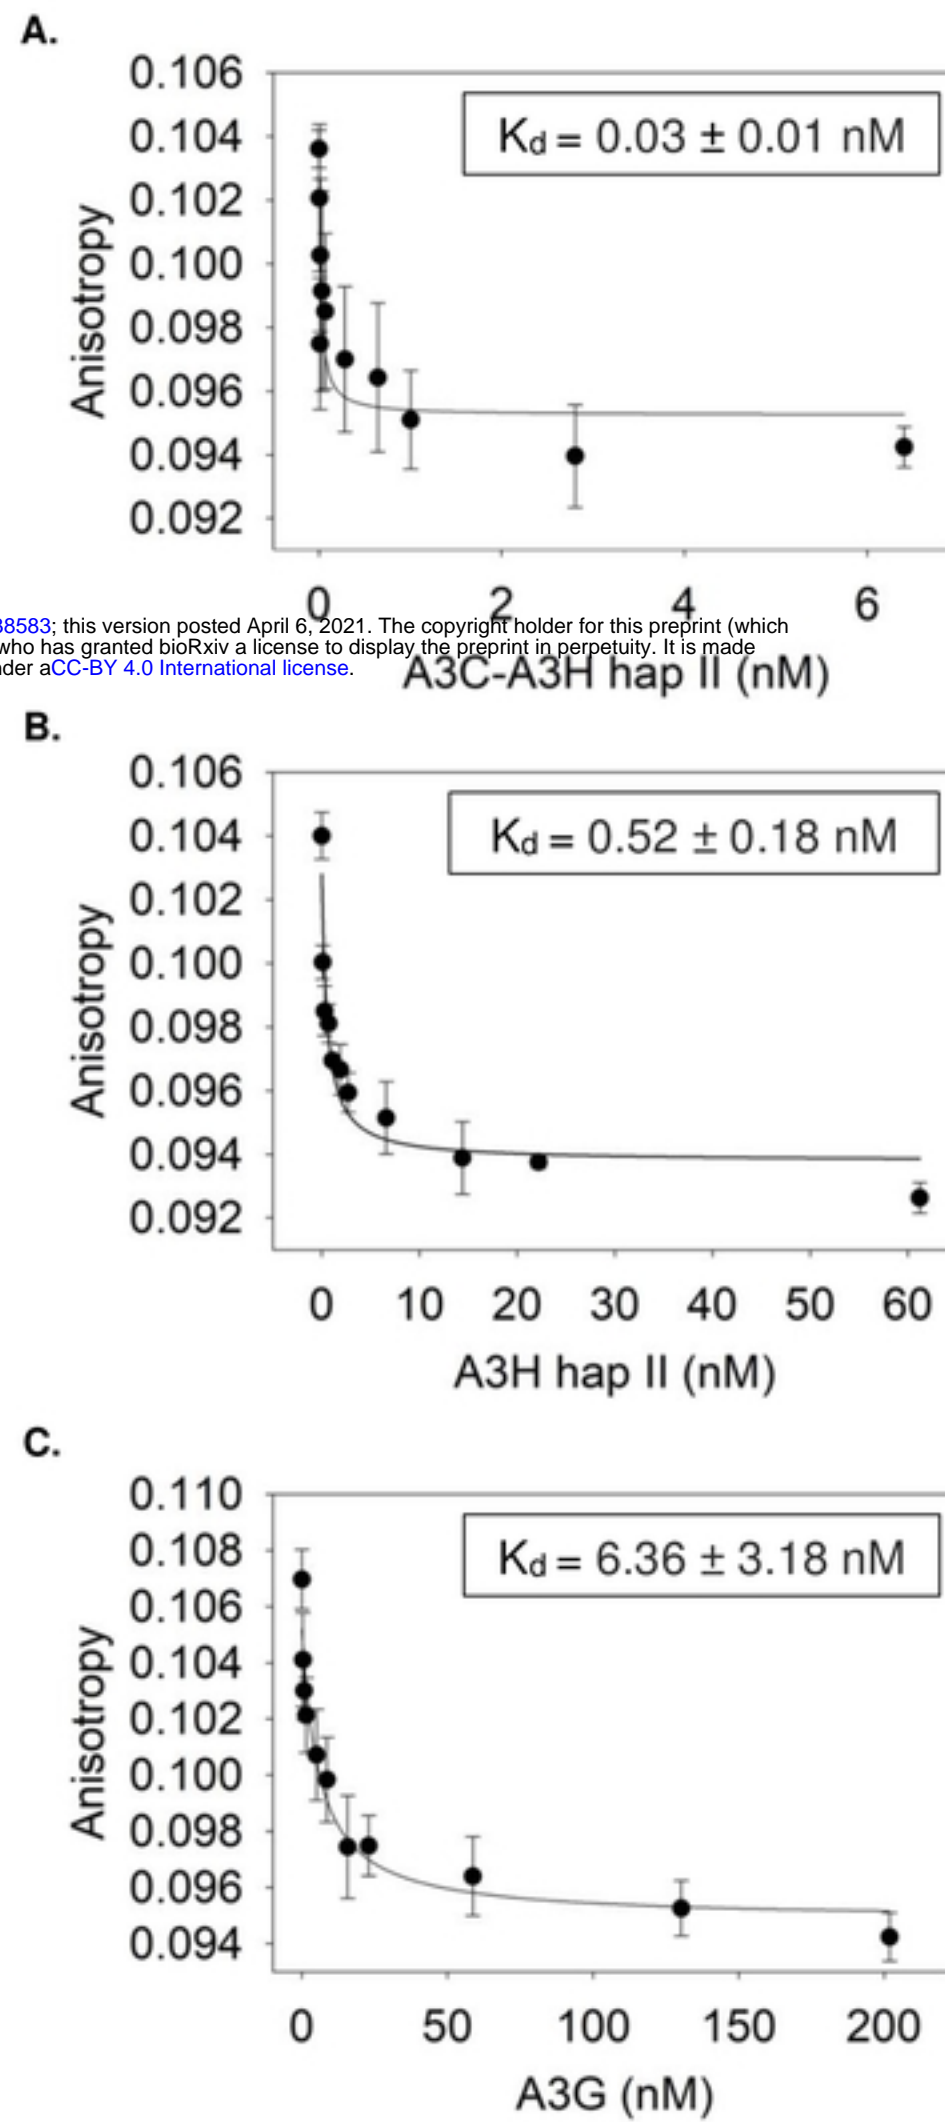

bioRxiv preprint doi: <https://doi.org/10.1101/2021.04.06.438583>; this version posted April 6, 2021. The copyright holder for this preprint (which was not certified by peer review) is the author/funder, who has granted bioRxiv a license to display the preprint in perpetuity. It is made available under aCC-BY 4.0 International license.

**Figure 5**

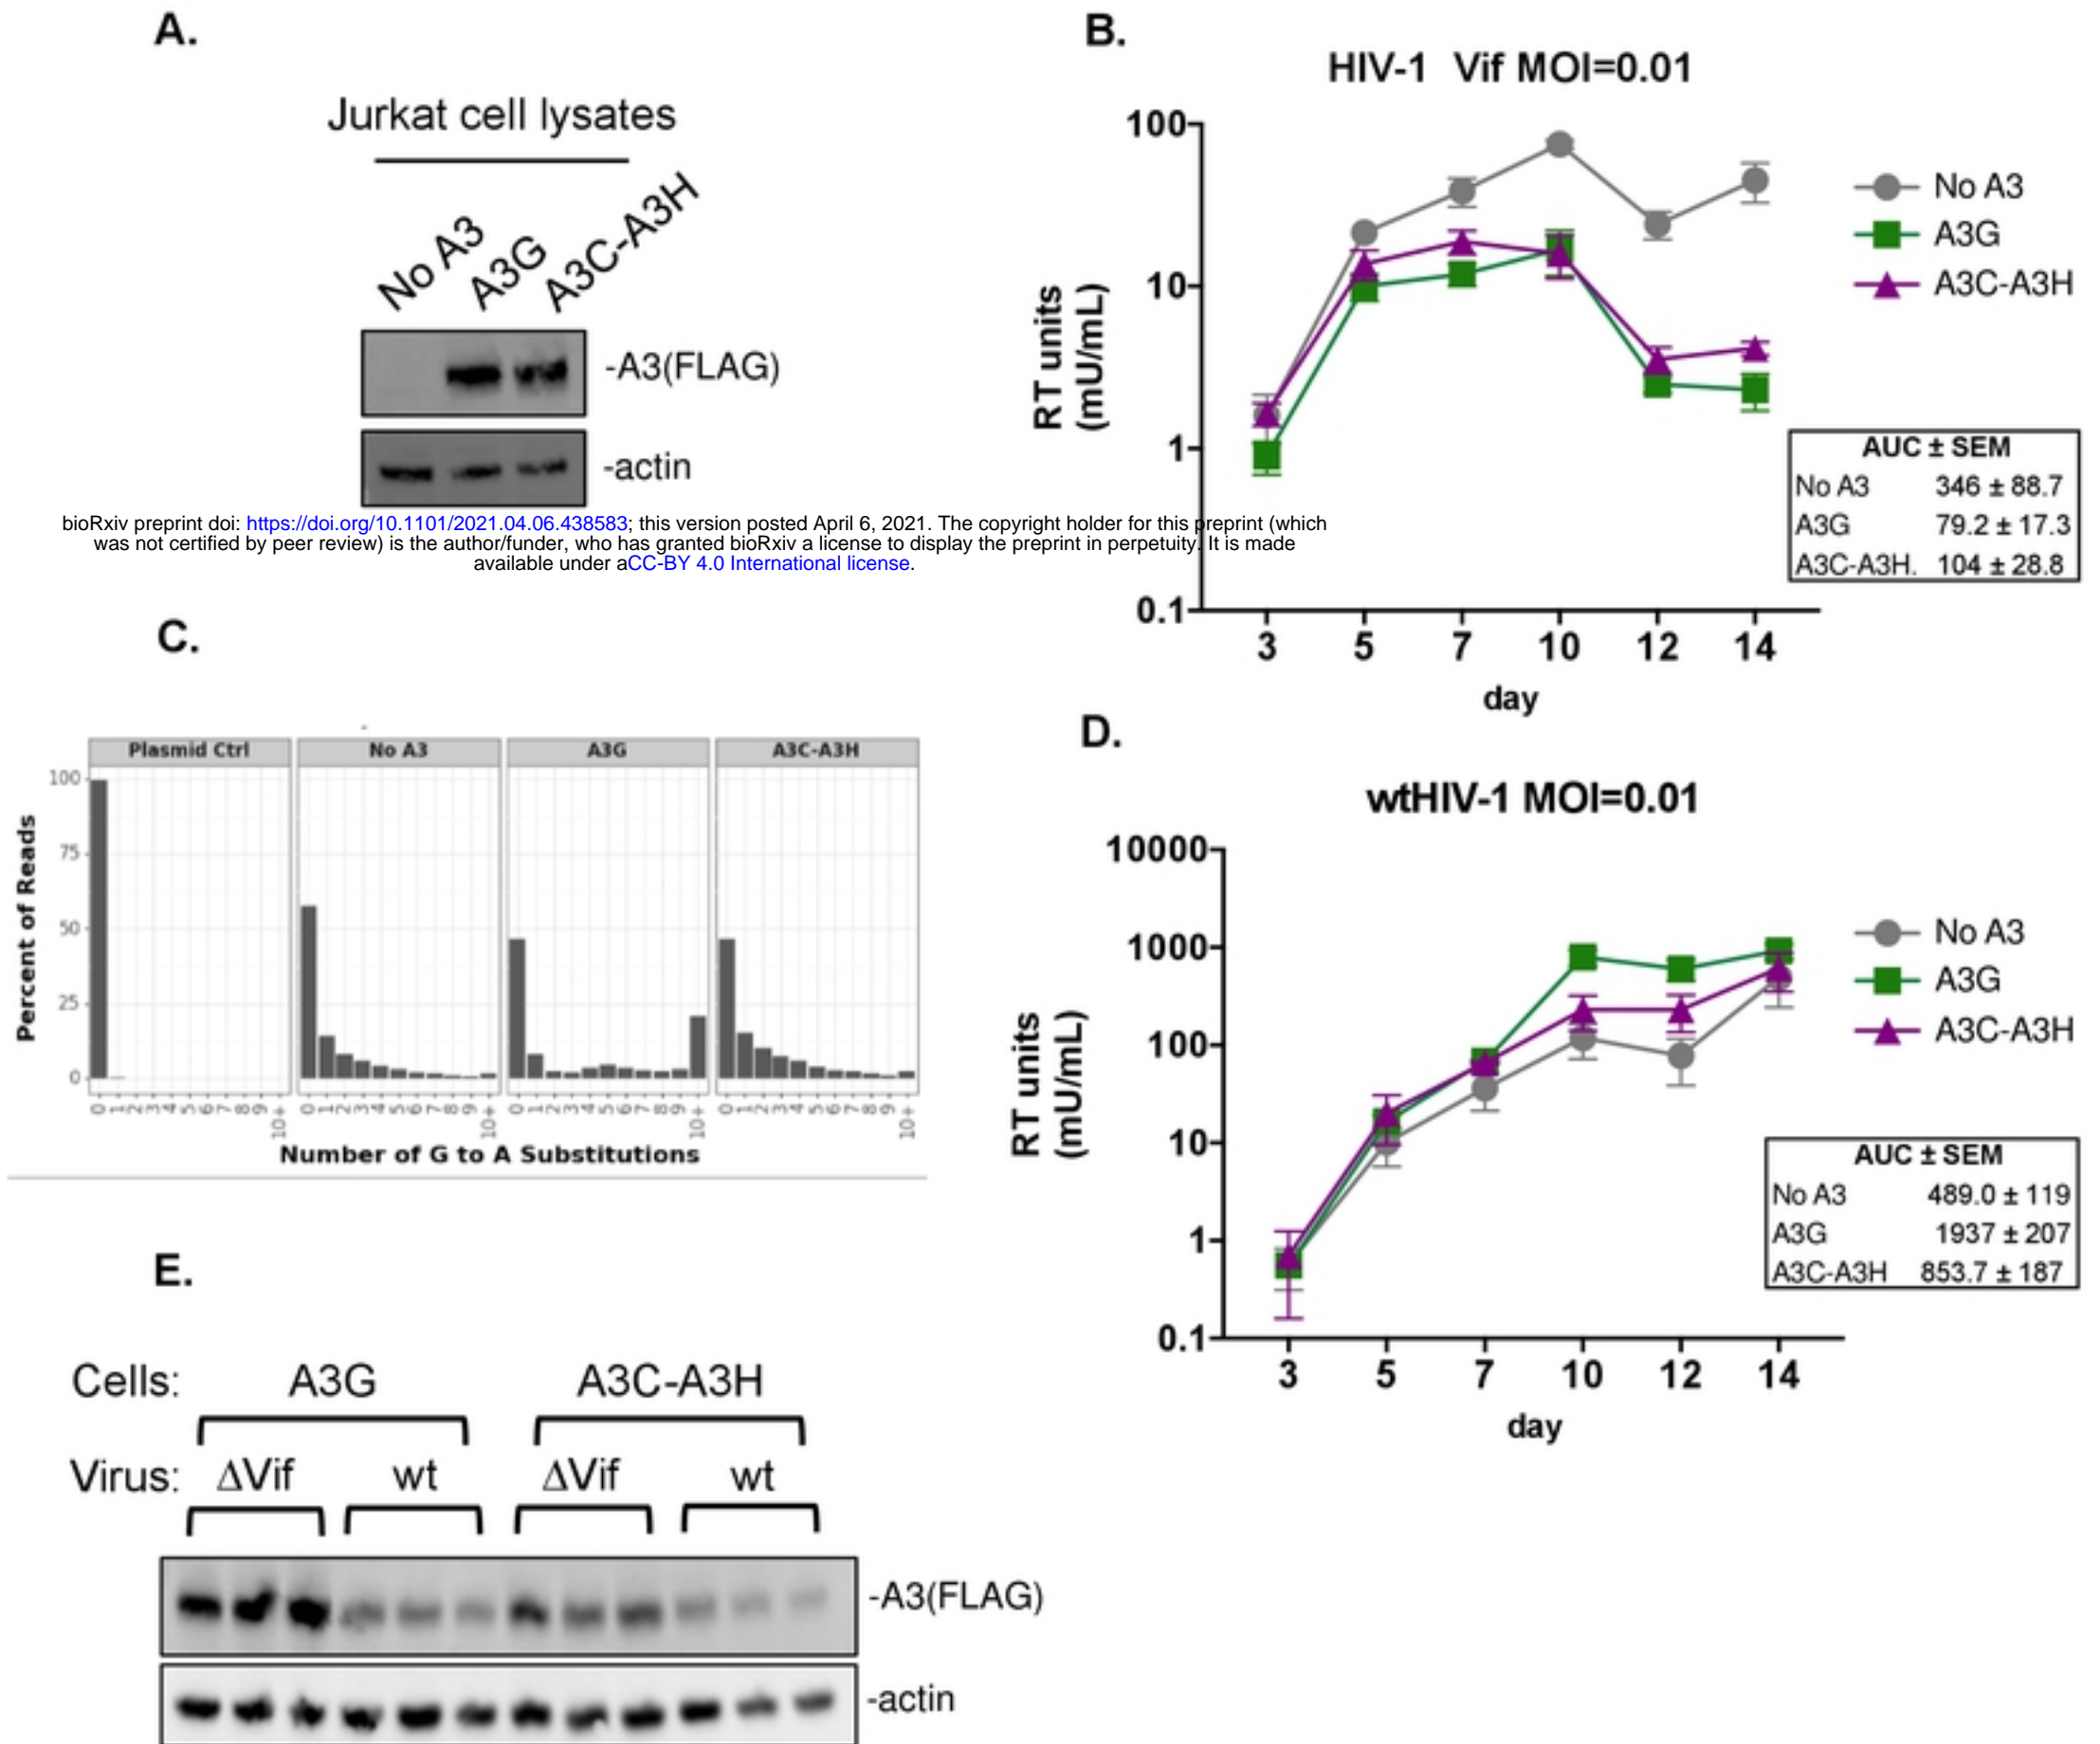

Source: https://www.biorxiv.org/content/biorxiv/early/2021/04/06/2021.04.06.438583.full.pdf
